# Supplementary material for: Characteristics of the first H16N3 subtype influenza A viruses isolated in western China
Source: PubMed Central journal article supplement — Transbound Emerg Dis. 2020 Apr 7;67(4):1677–87. doi: 10.1111/tbed.13511 (PMC7384121; doi:10.1111/tbed.13511), 2020-04-07
Supplement: TBED-67-1677-s001.pdf [file TBED-67-1677-s001.pdf]

Figure S1

(a)-NA

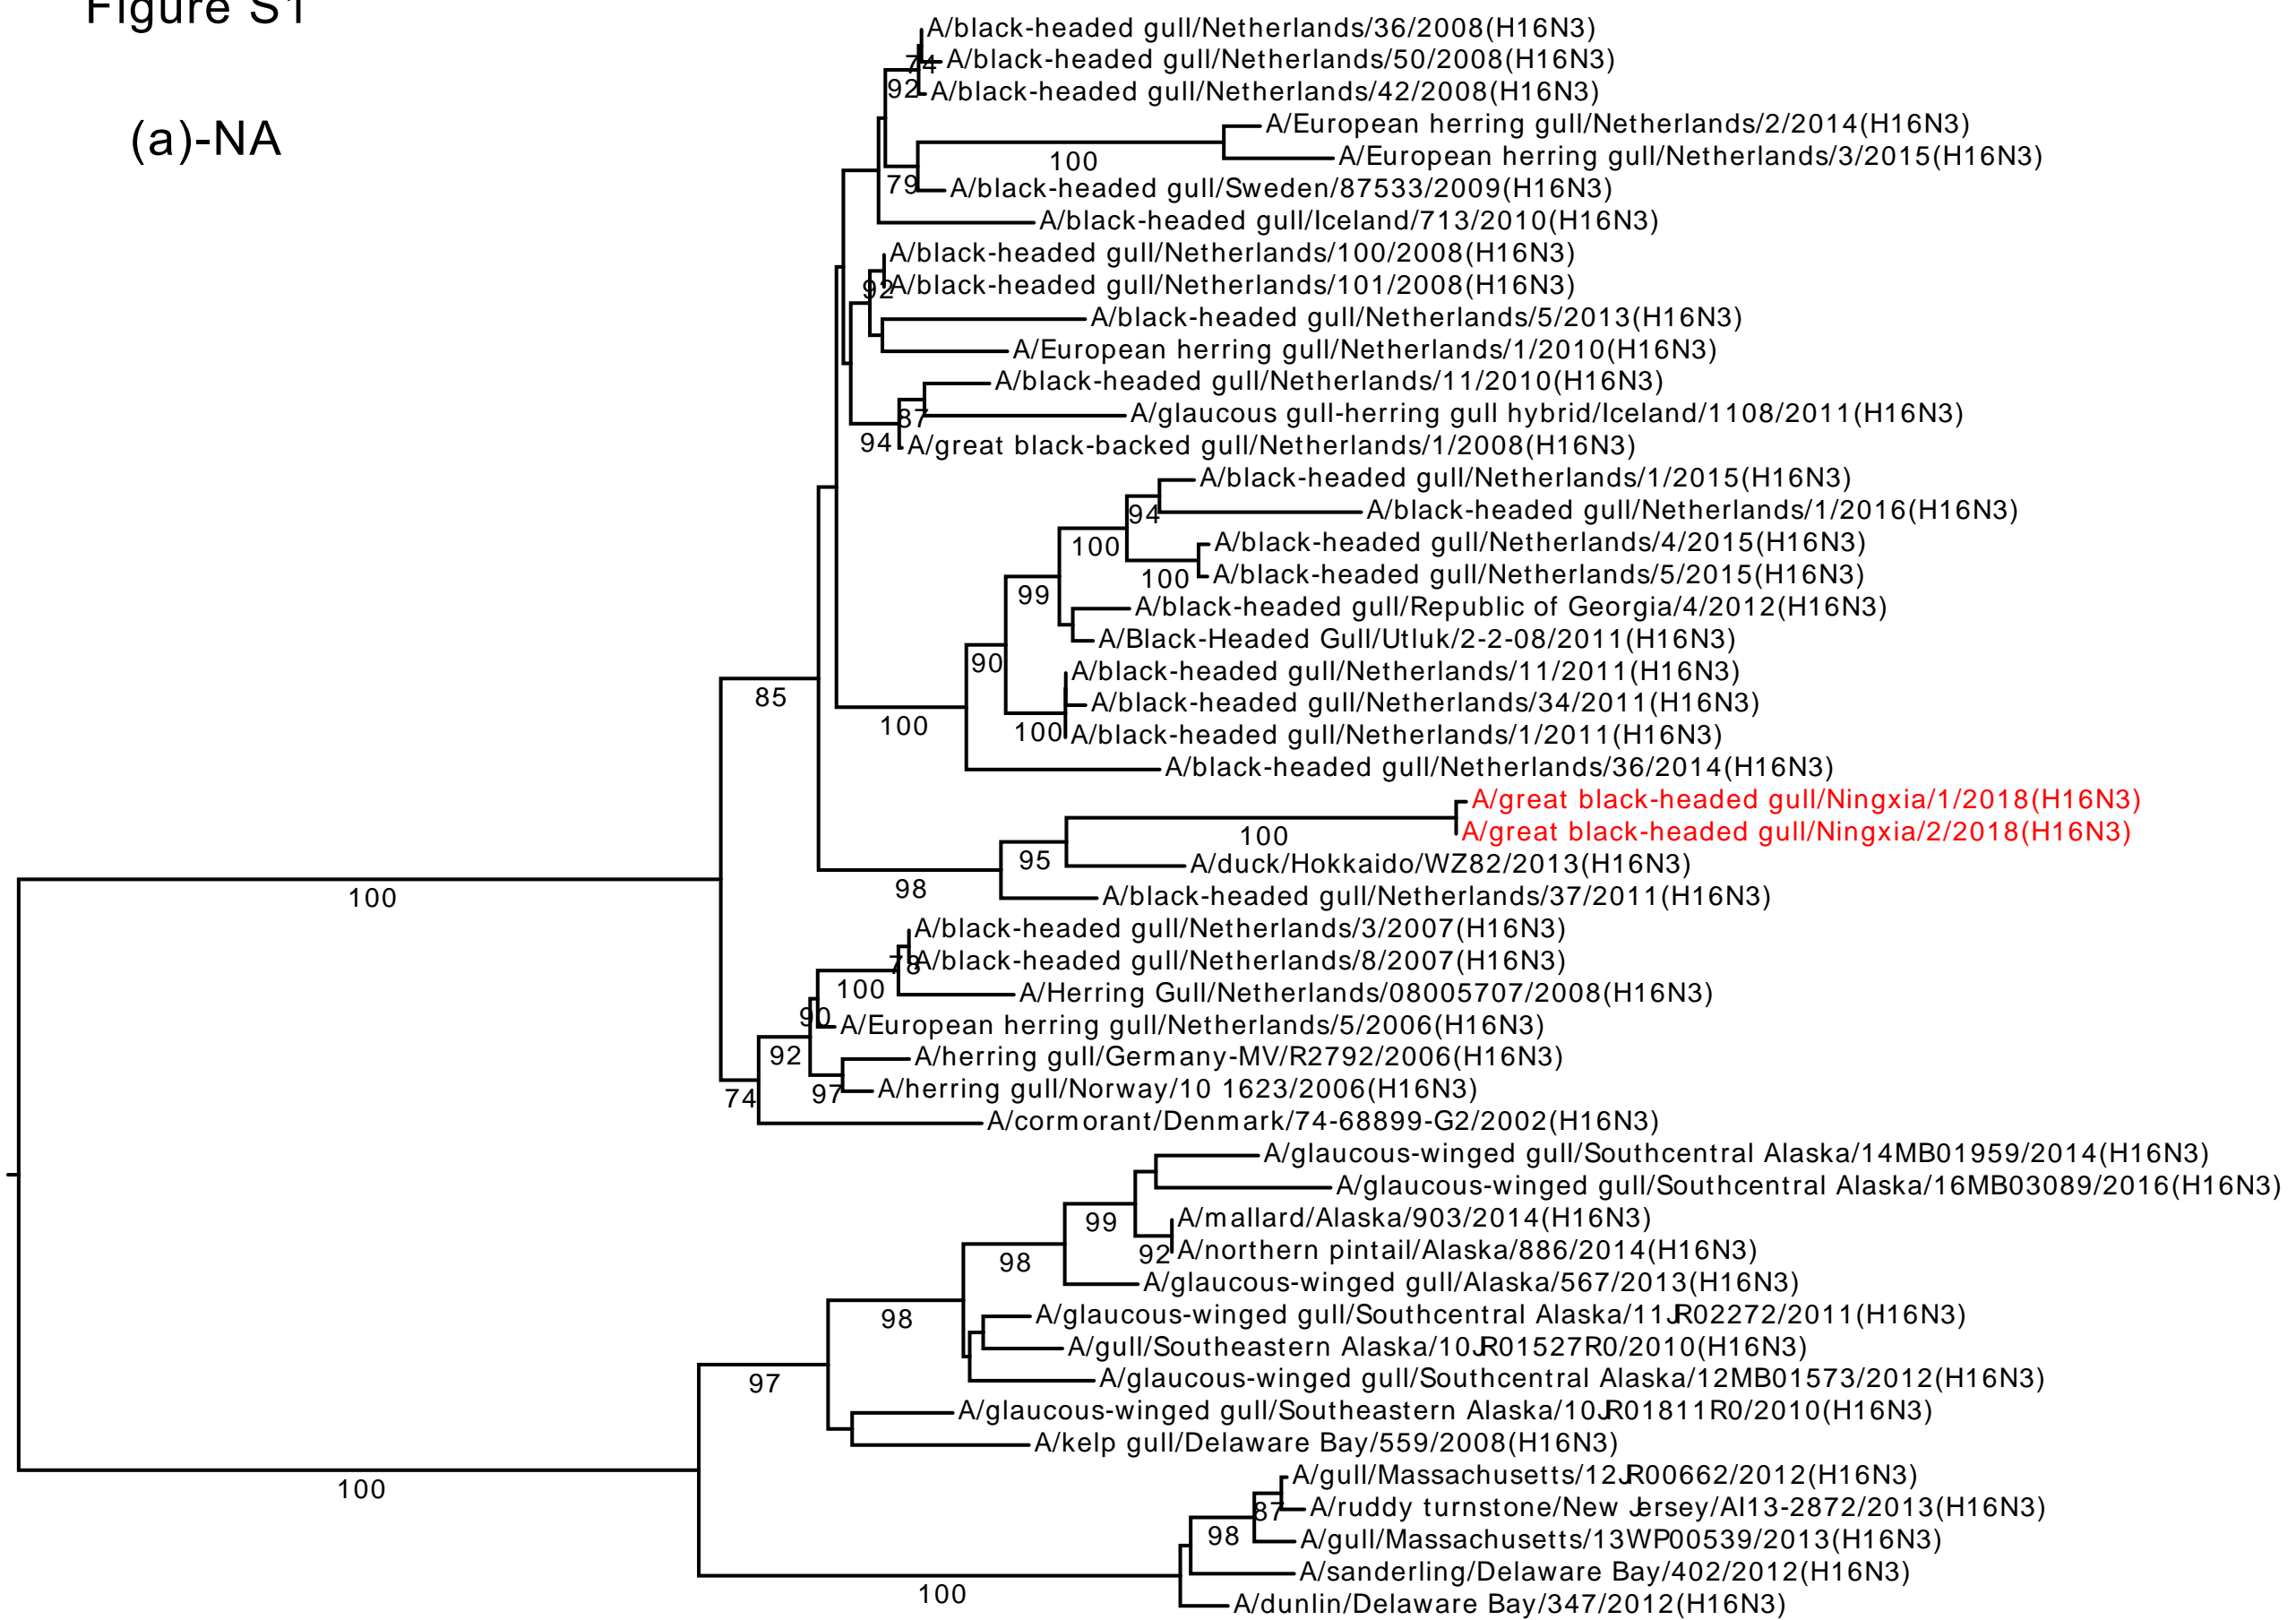

Eurasian lineage

North American lineage

0.01

(b)-PB2

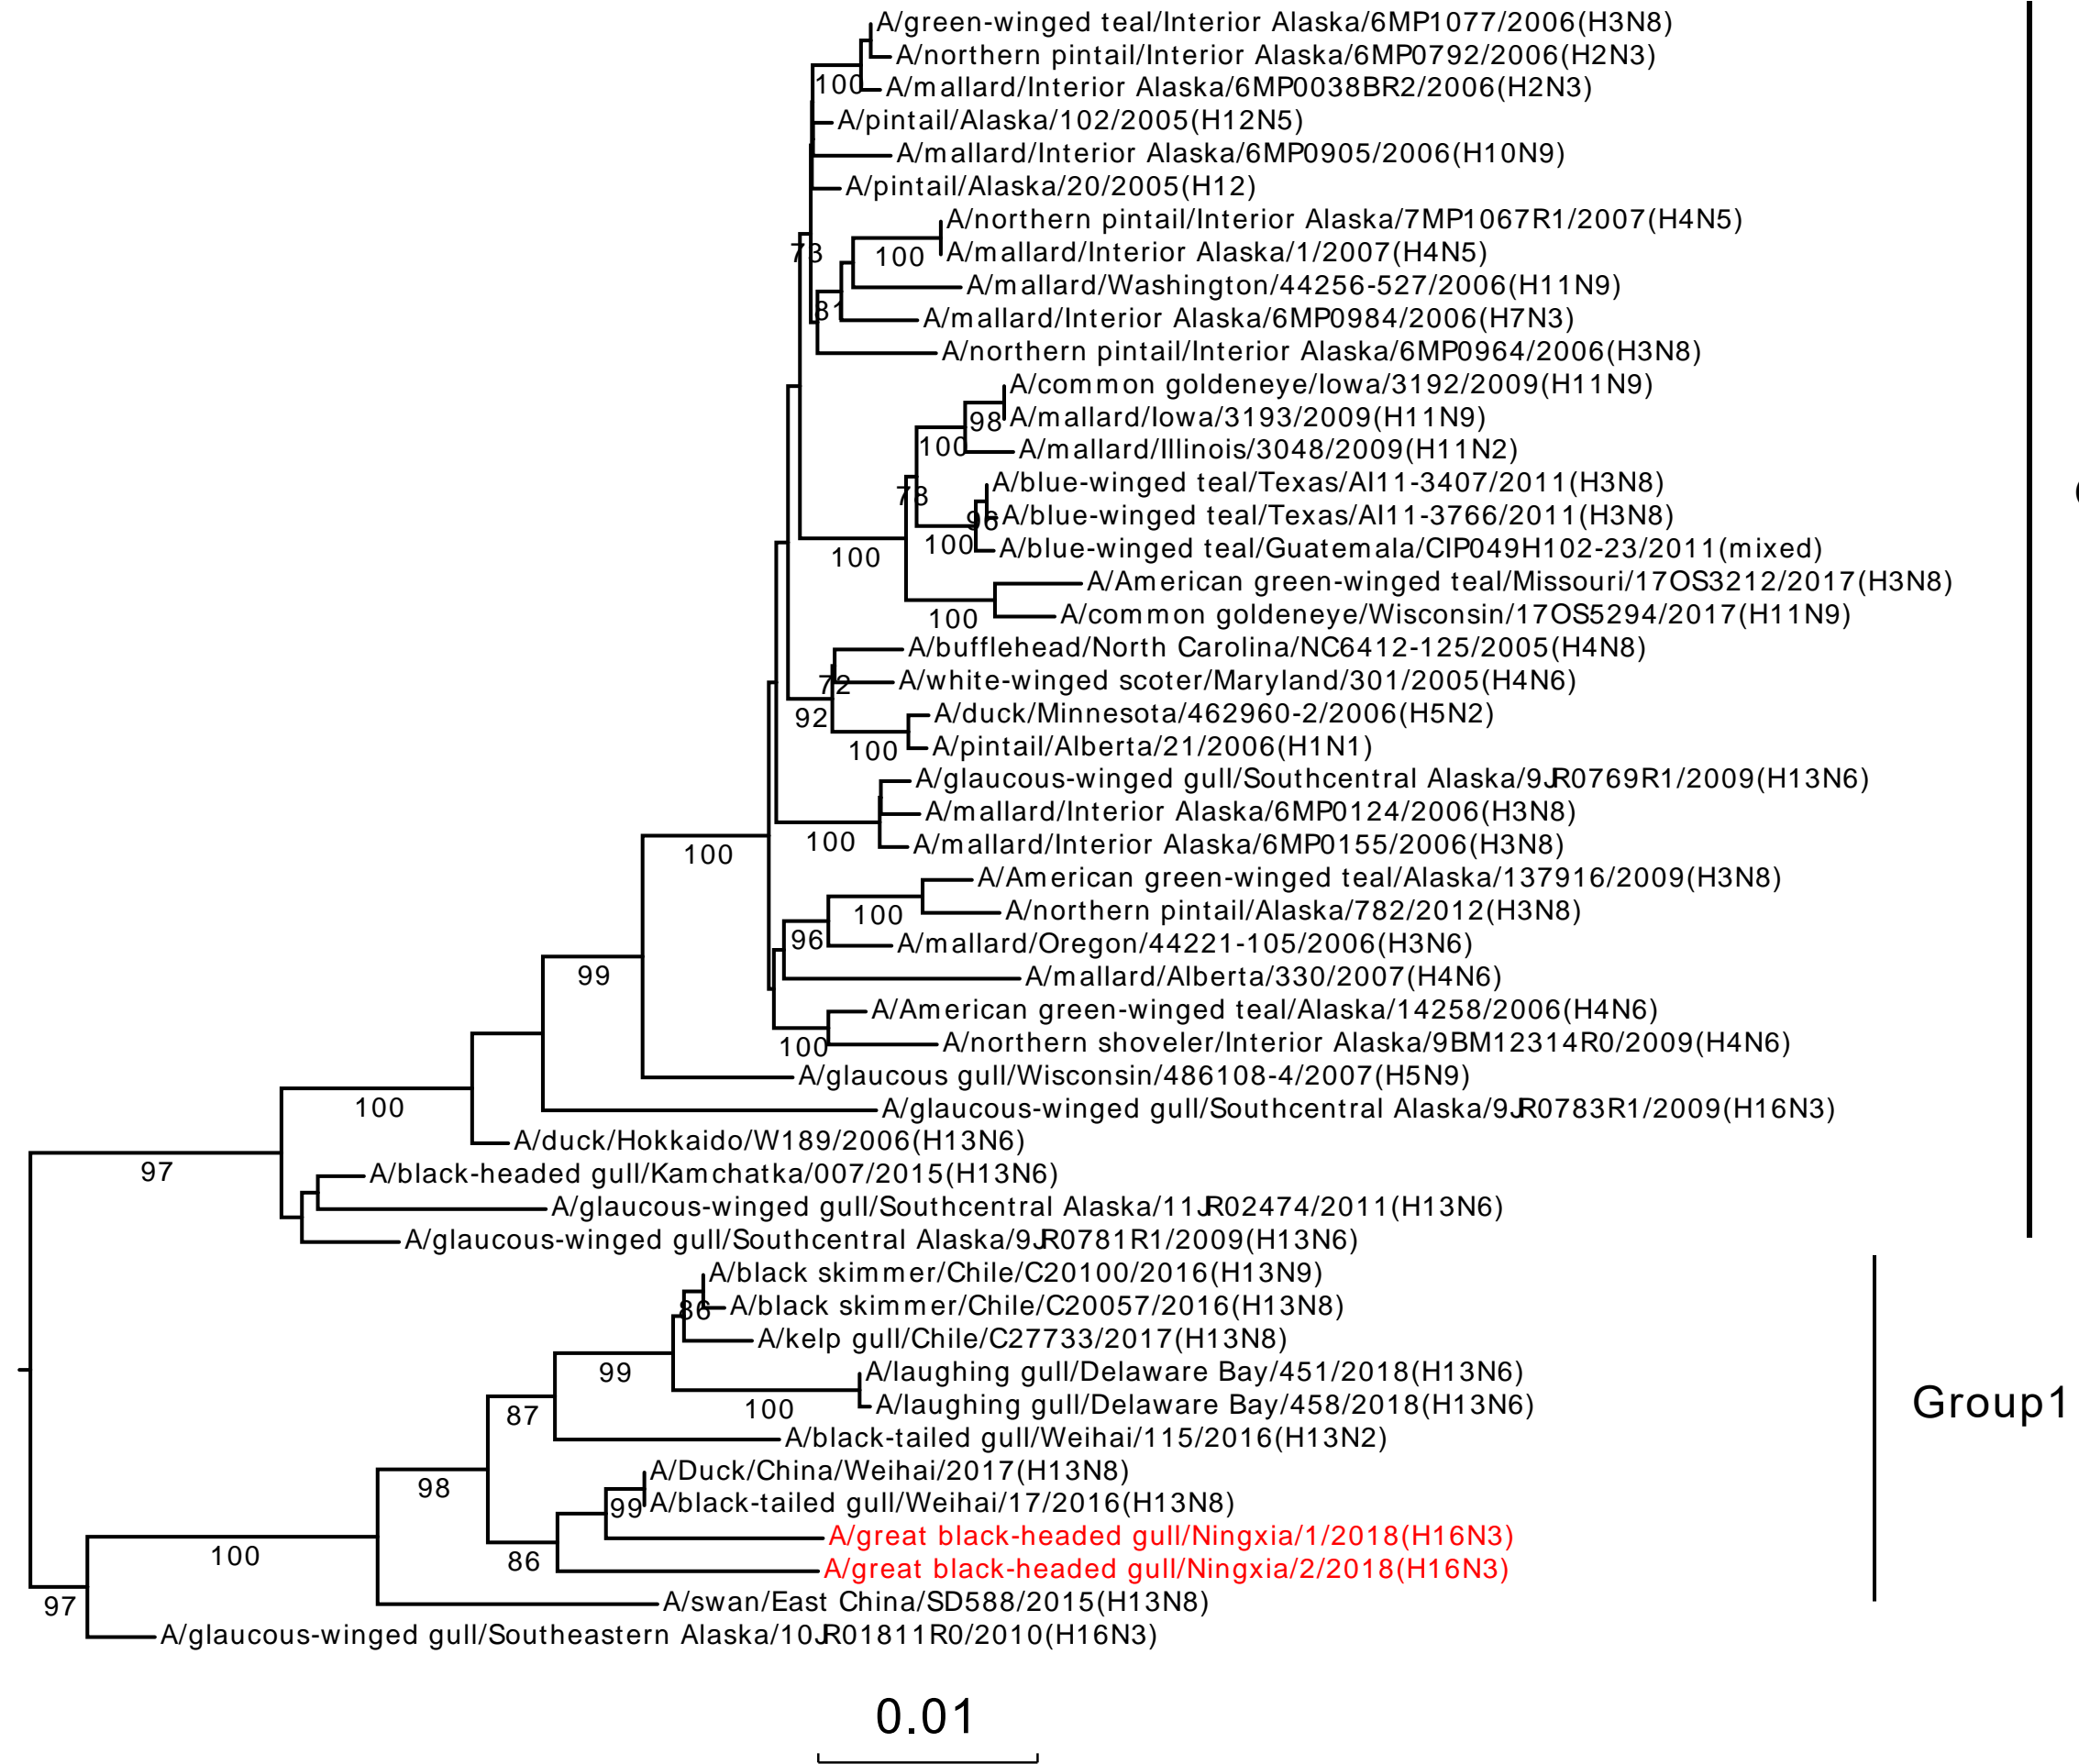

(c)-PA

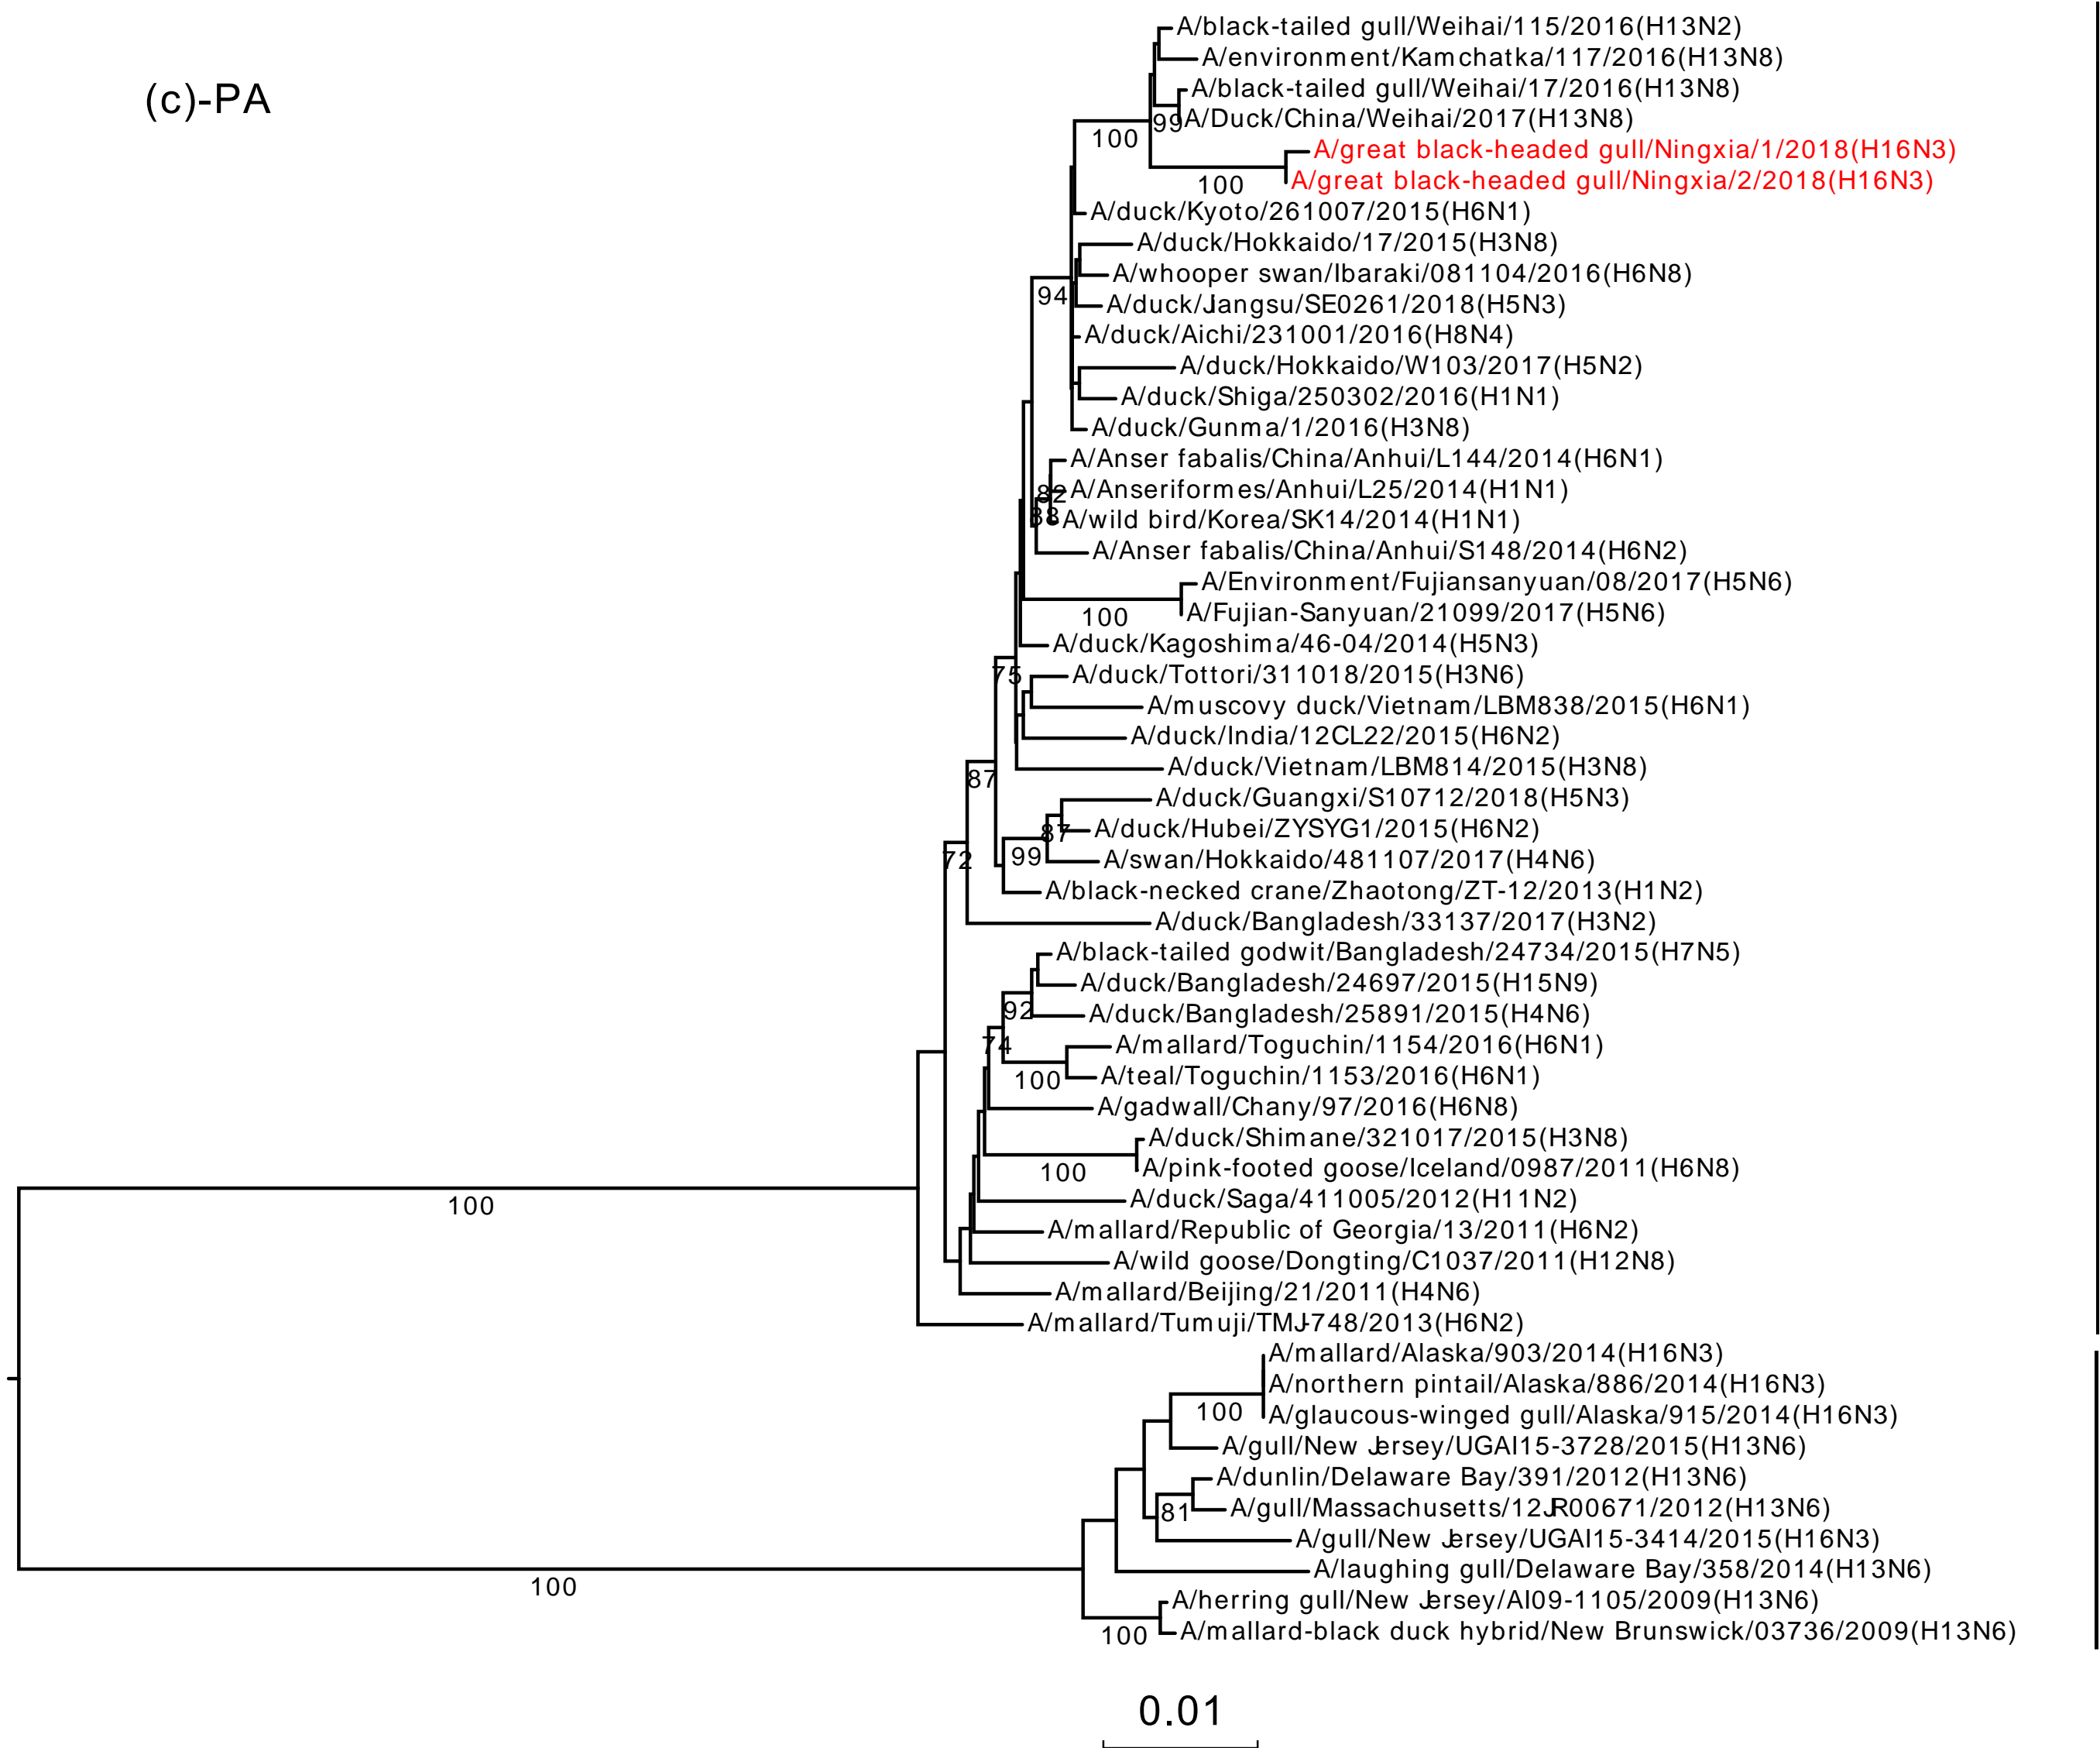

Eurasian lineage

North American lineage

0.01

(d)-NP

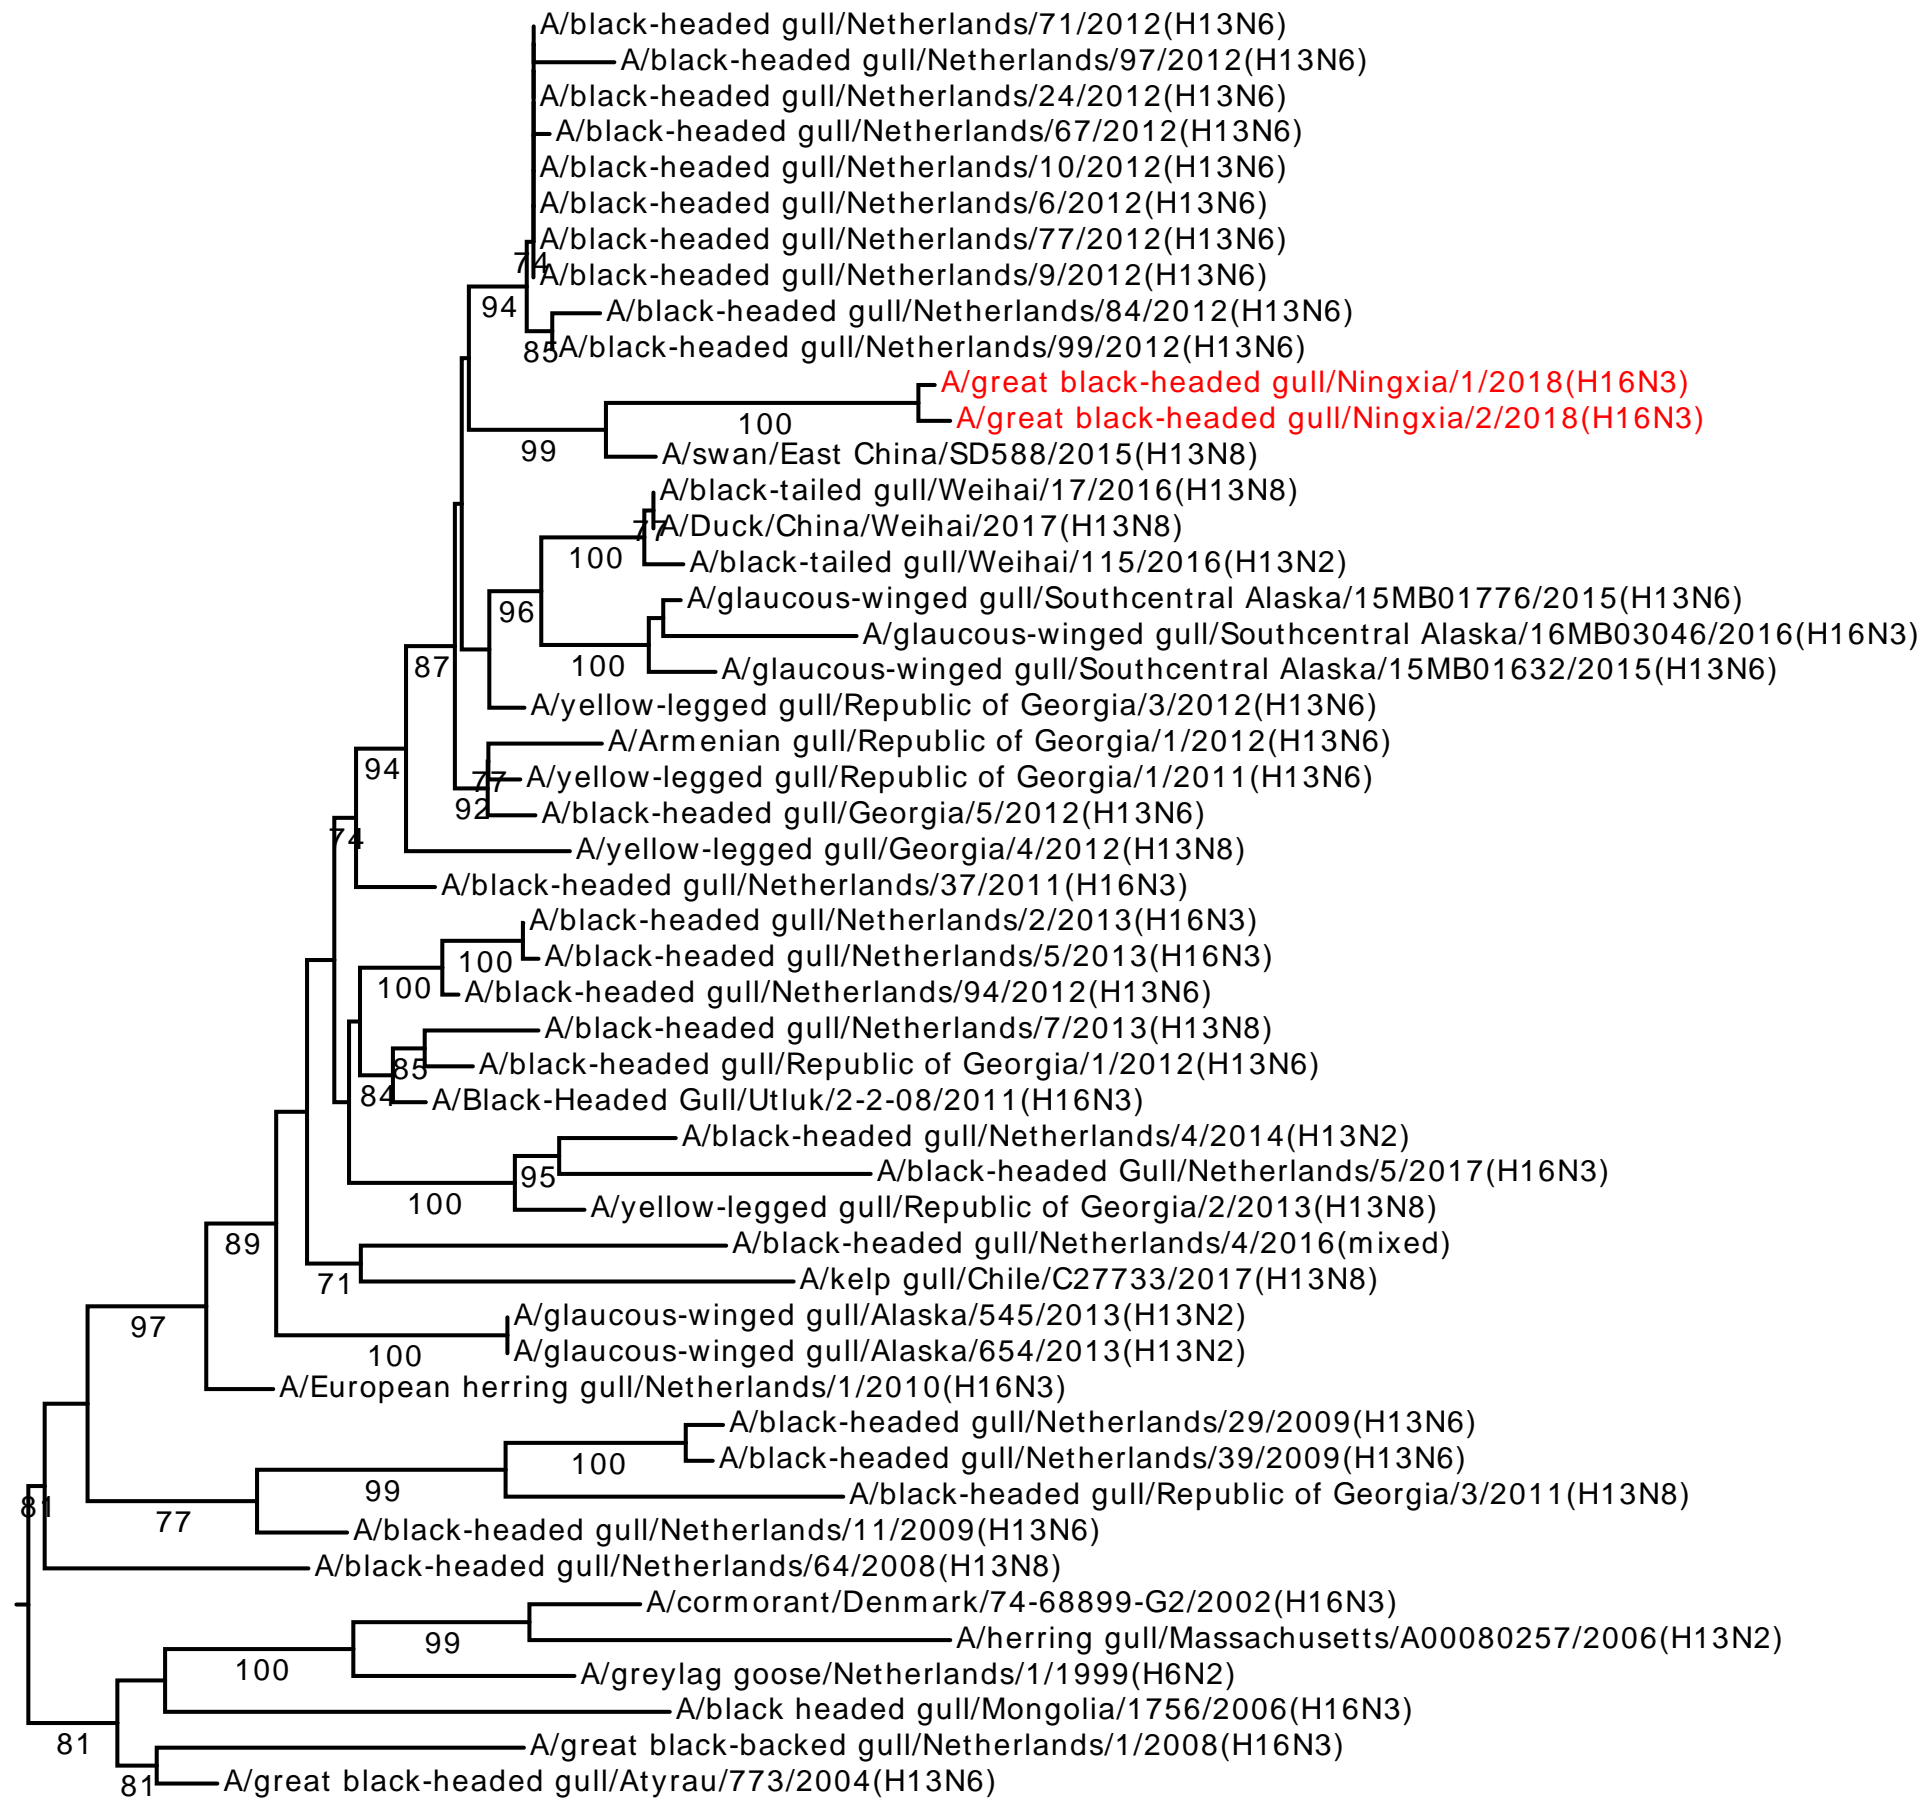

Group1

Group2

0.01

(e)-M

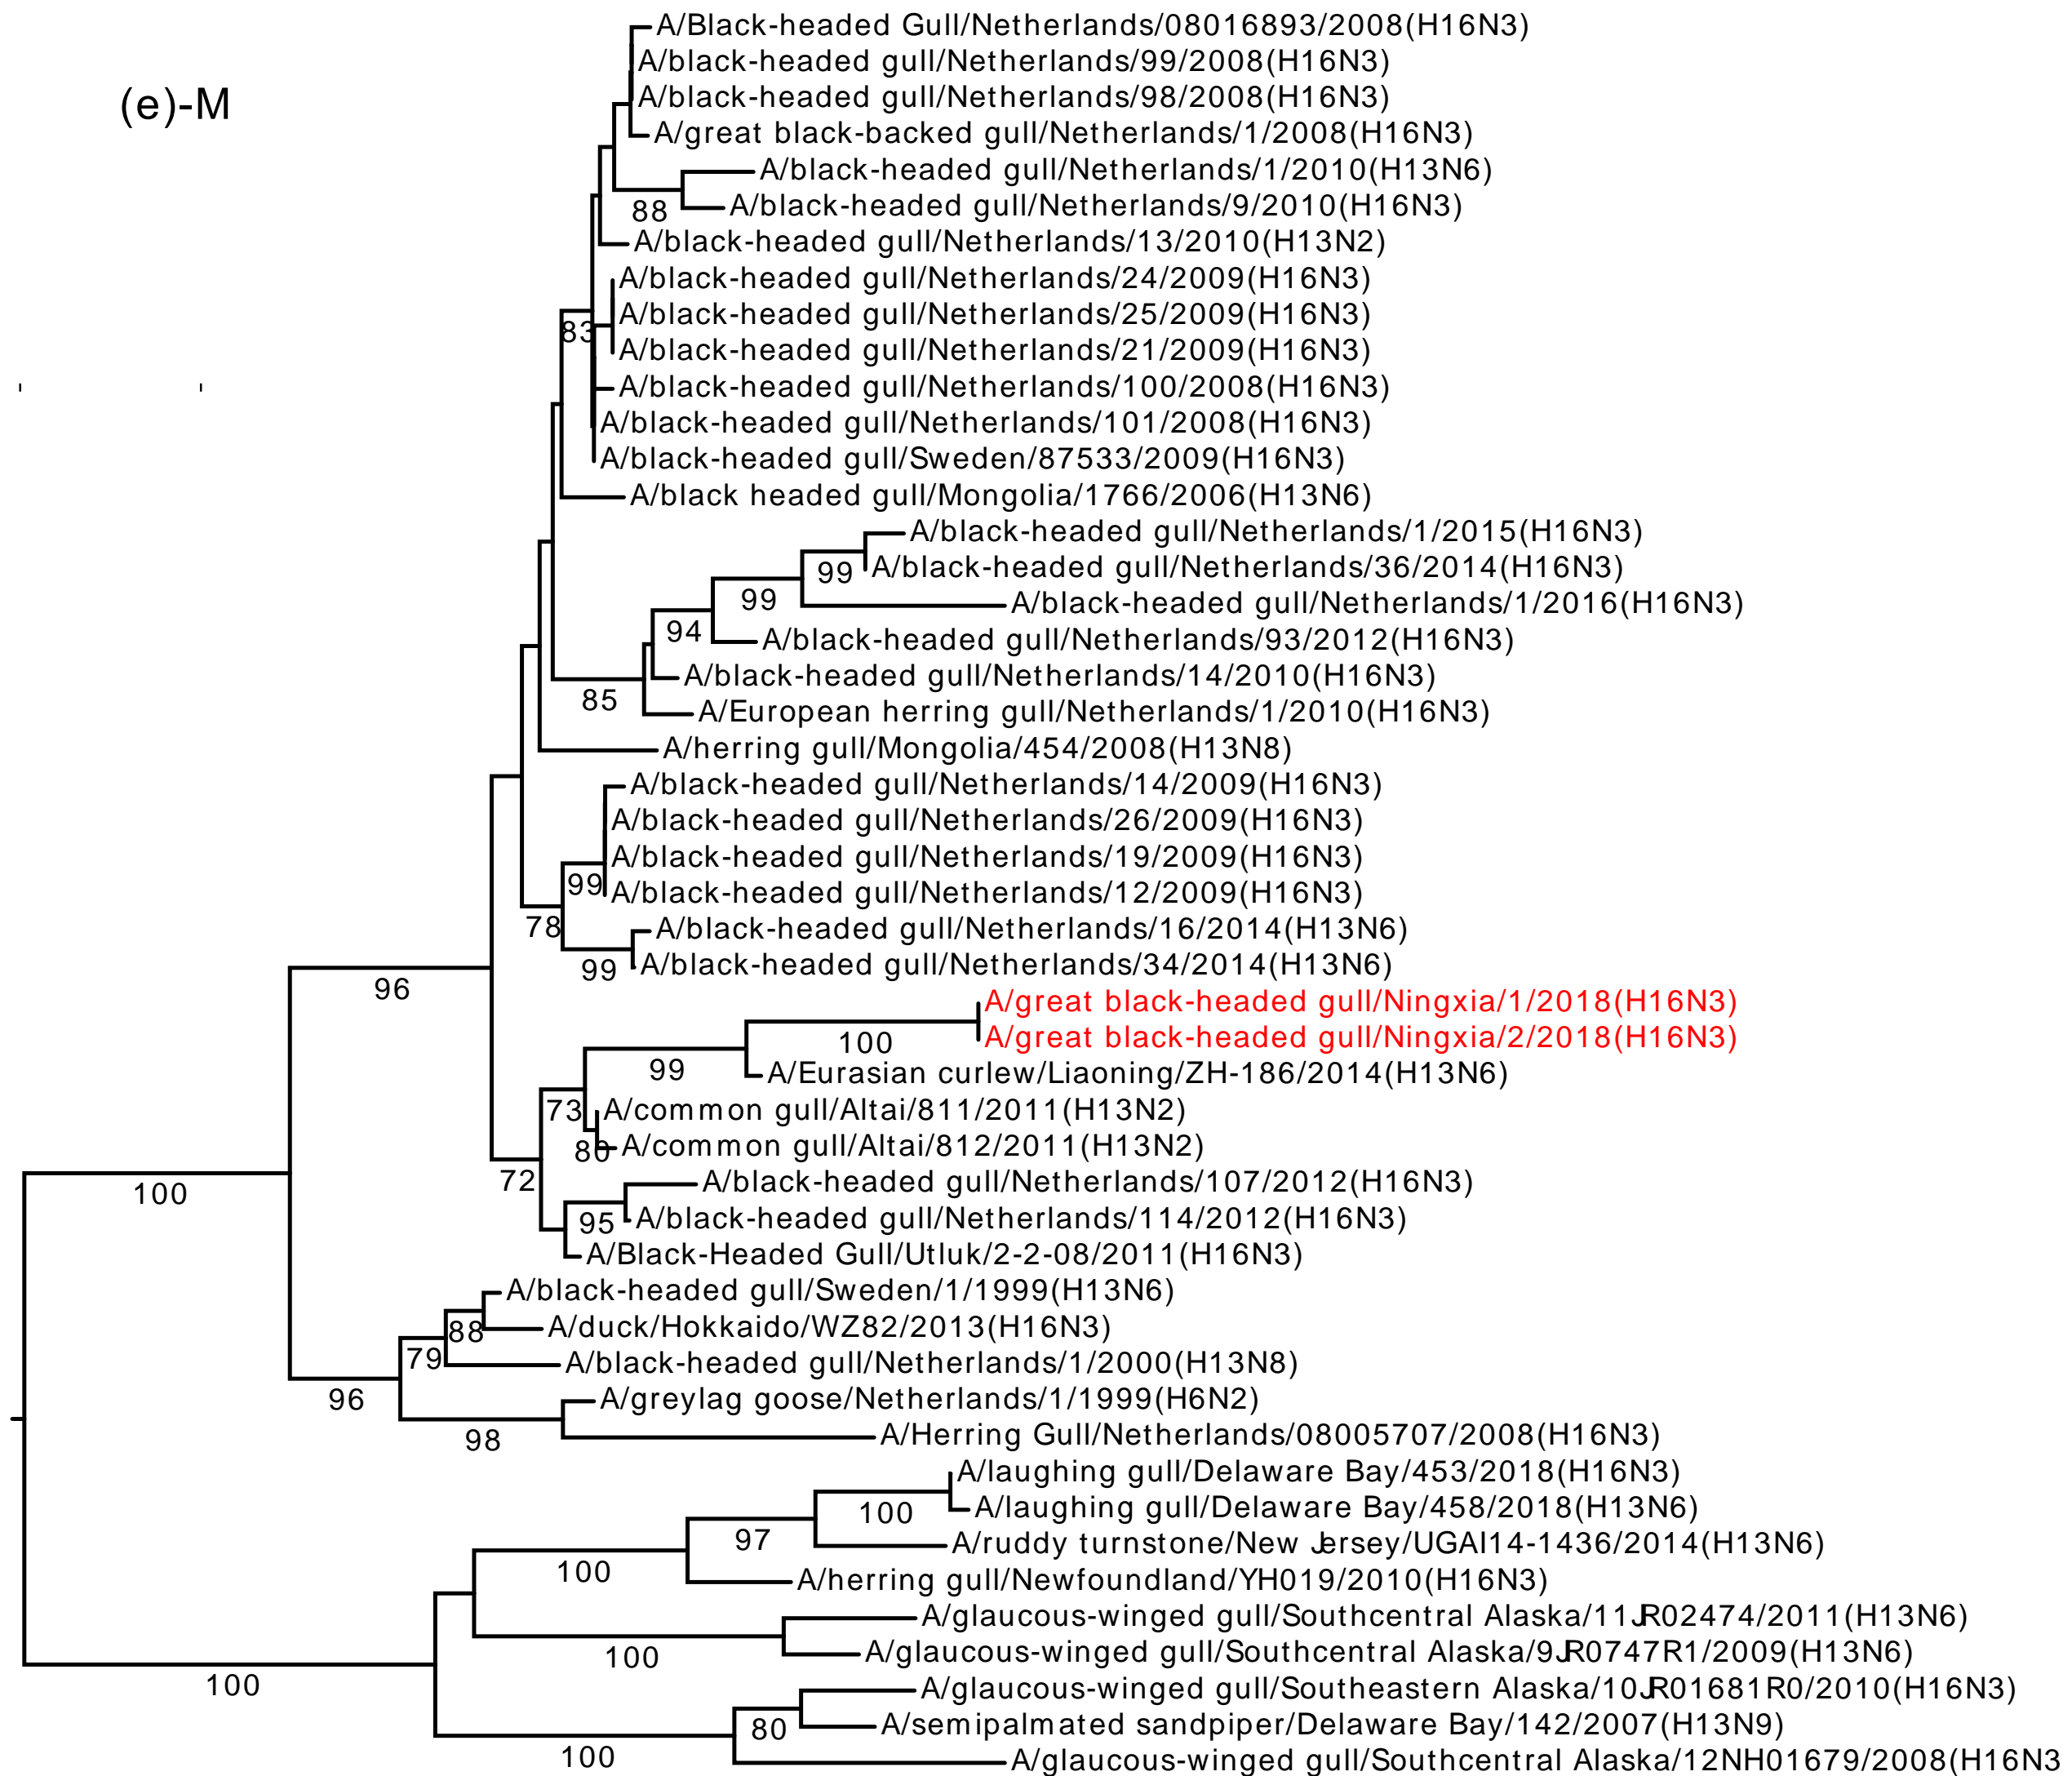

Eurasian lineage

North American lineage

0.01

(f)-NS

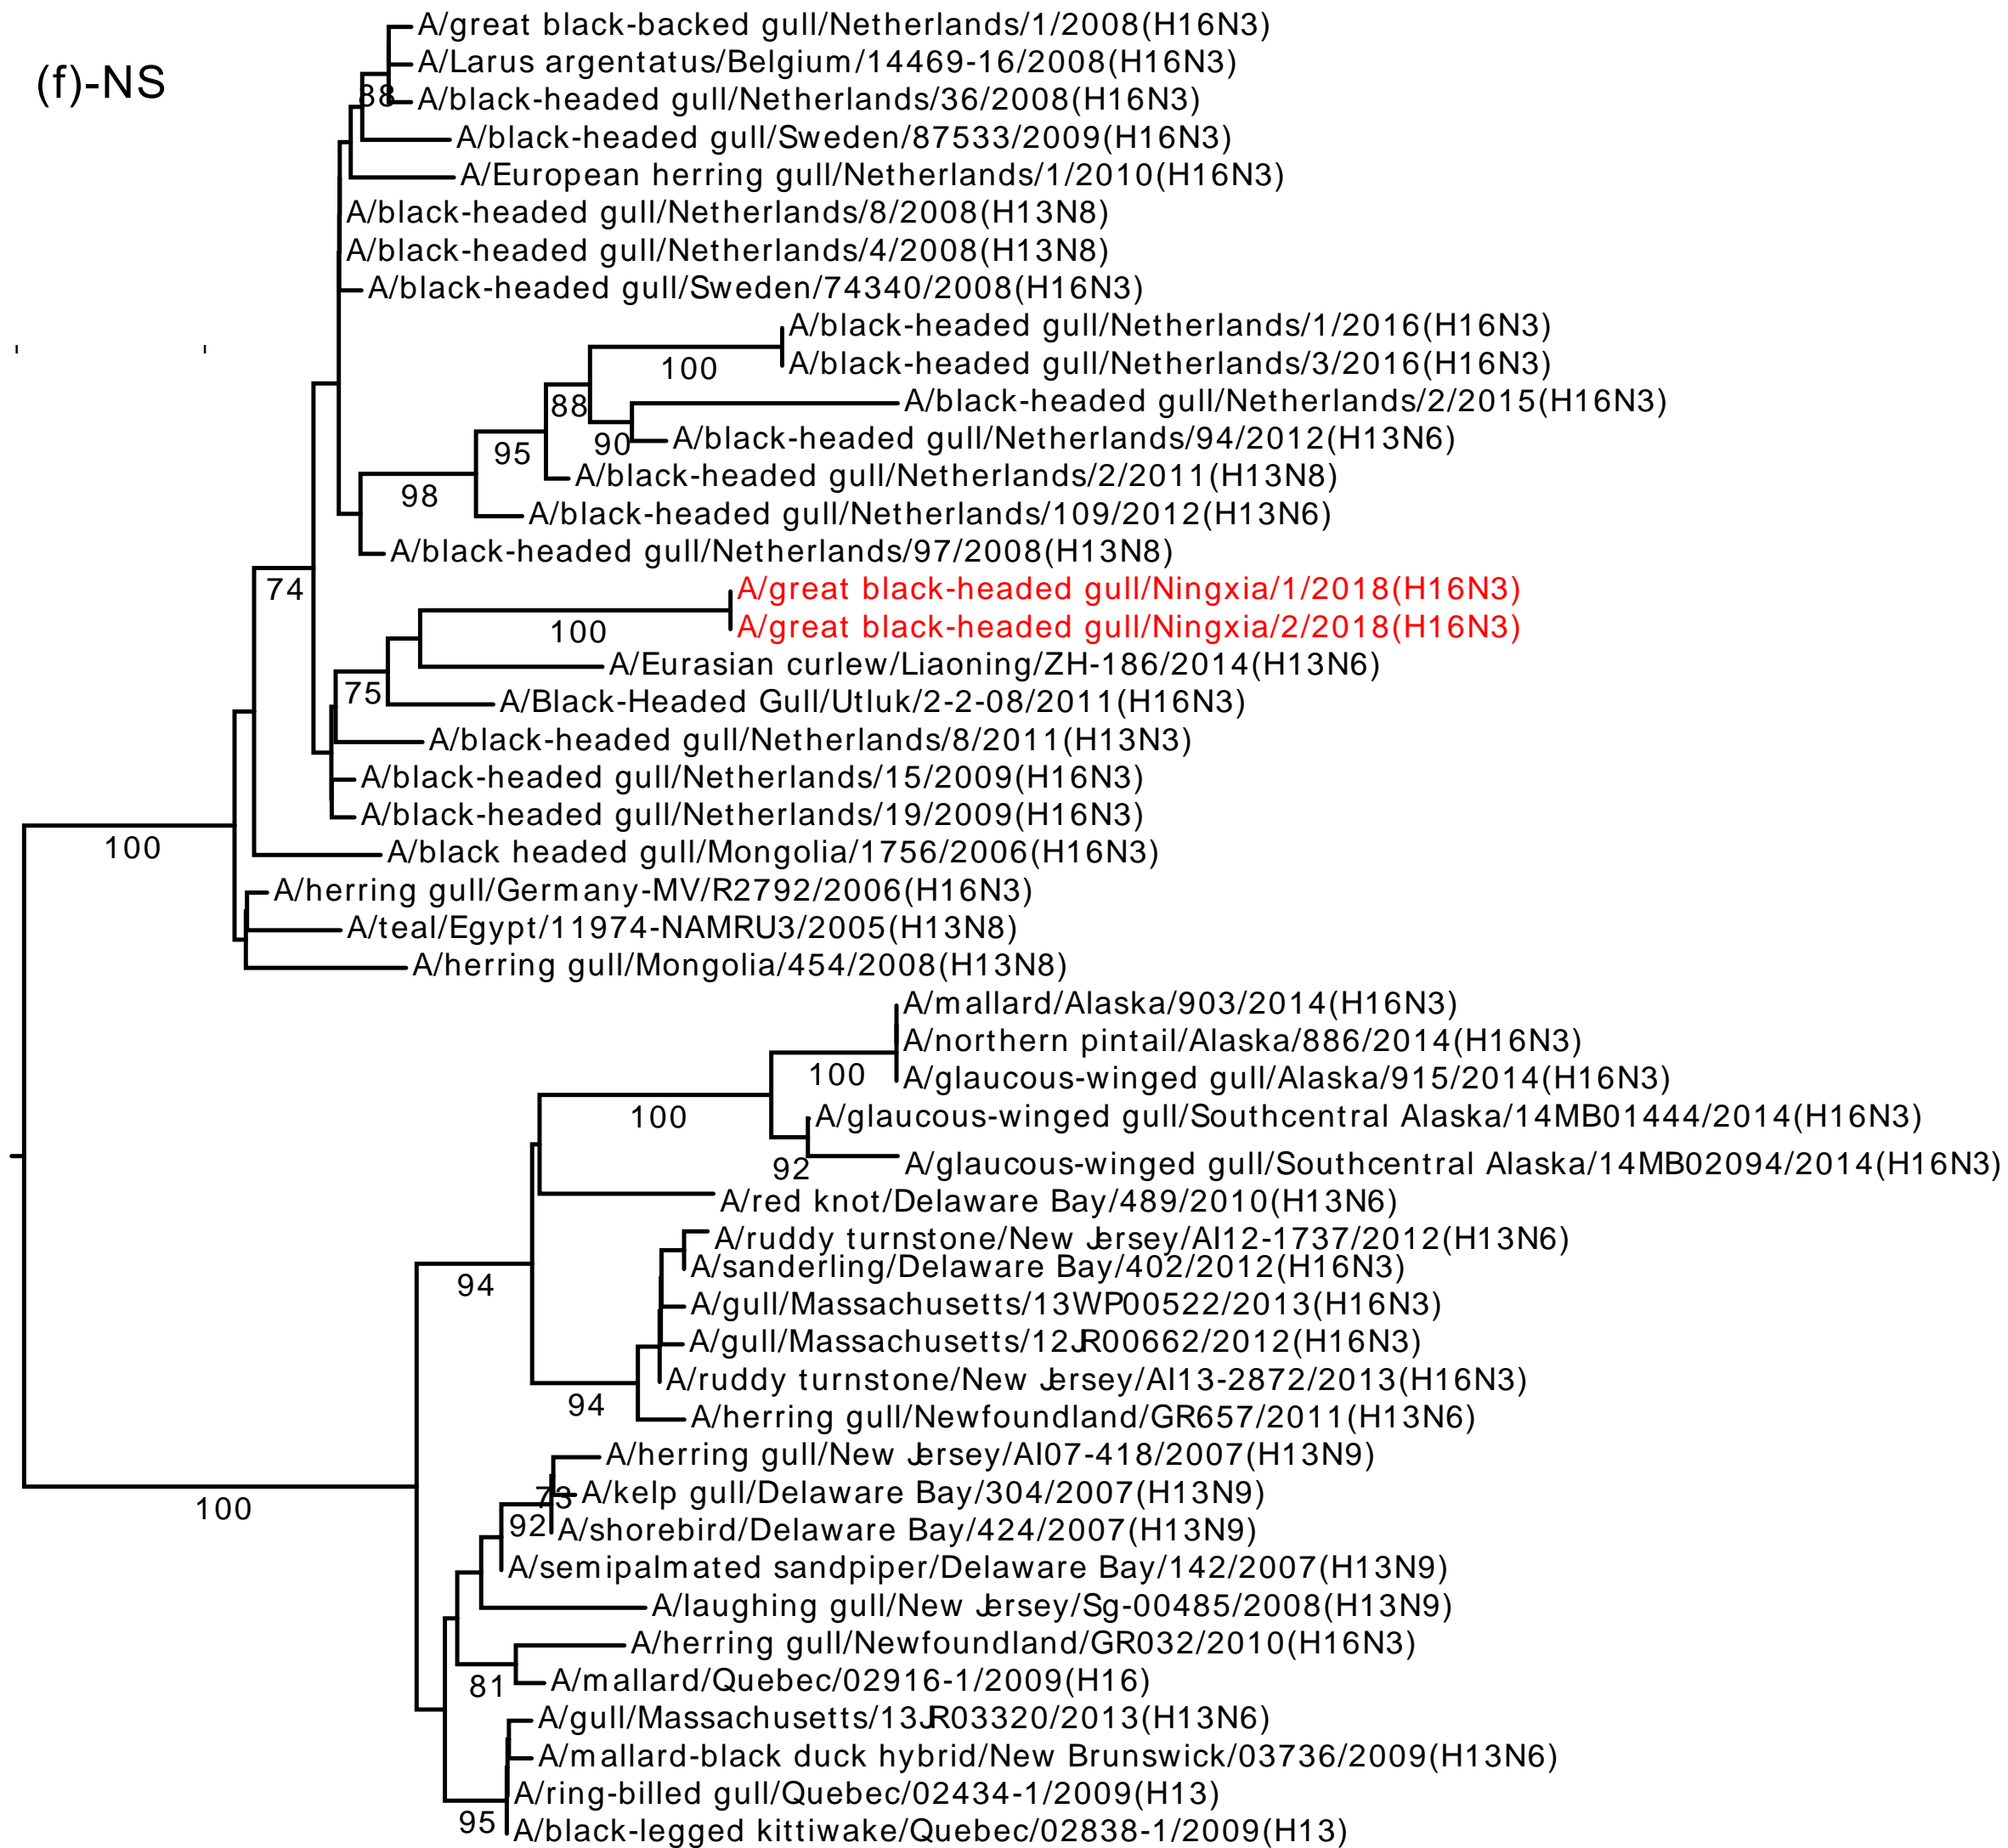

0.01
