# Supplementary figures and images for: Characteristics of the first H16N3 subtype influenza A viruses isolated in western China
Source: PubMed Central journal article supplement — Transbound Emerg Dis. 2020 Apr 7;67(4):1677–87. doi: 10.1111/tbed.13511 (PMC7384121; doi:10.1111/tbed.13511), 2020-04-07

Figure S2

(a)-NA

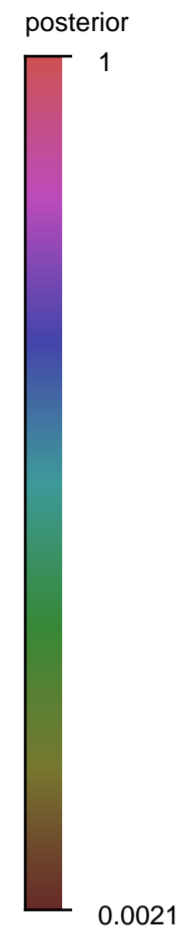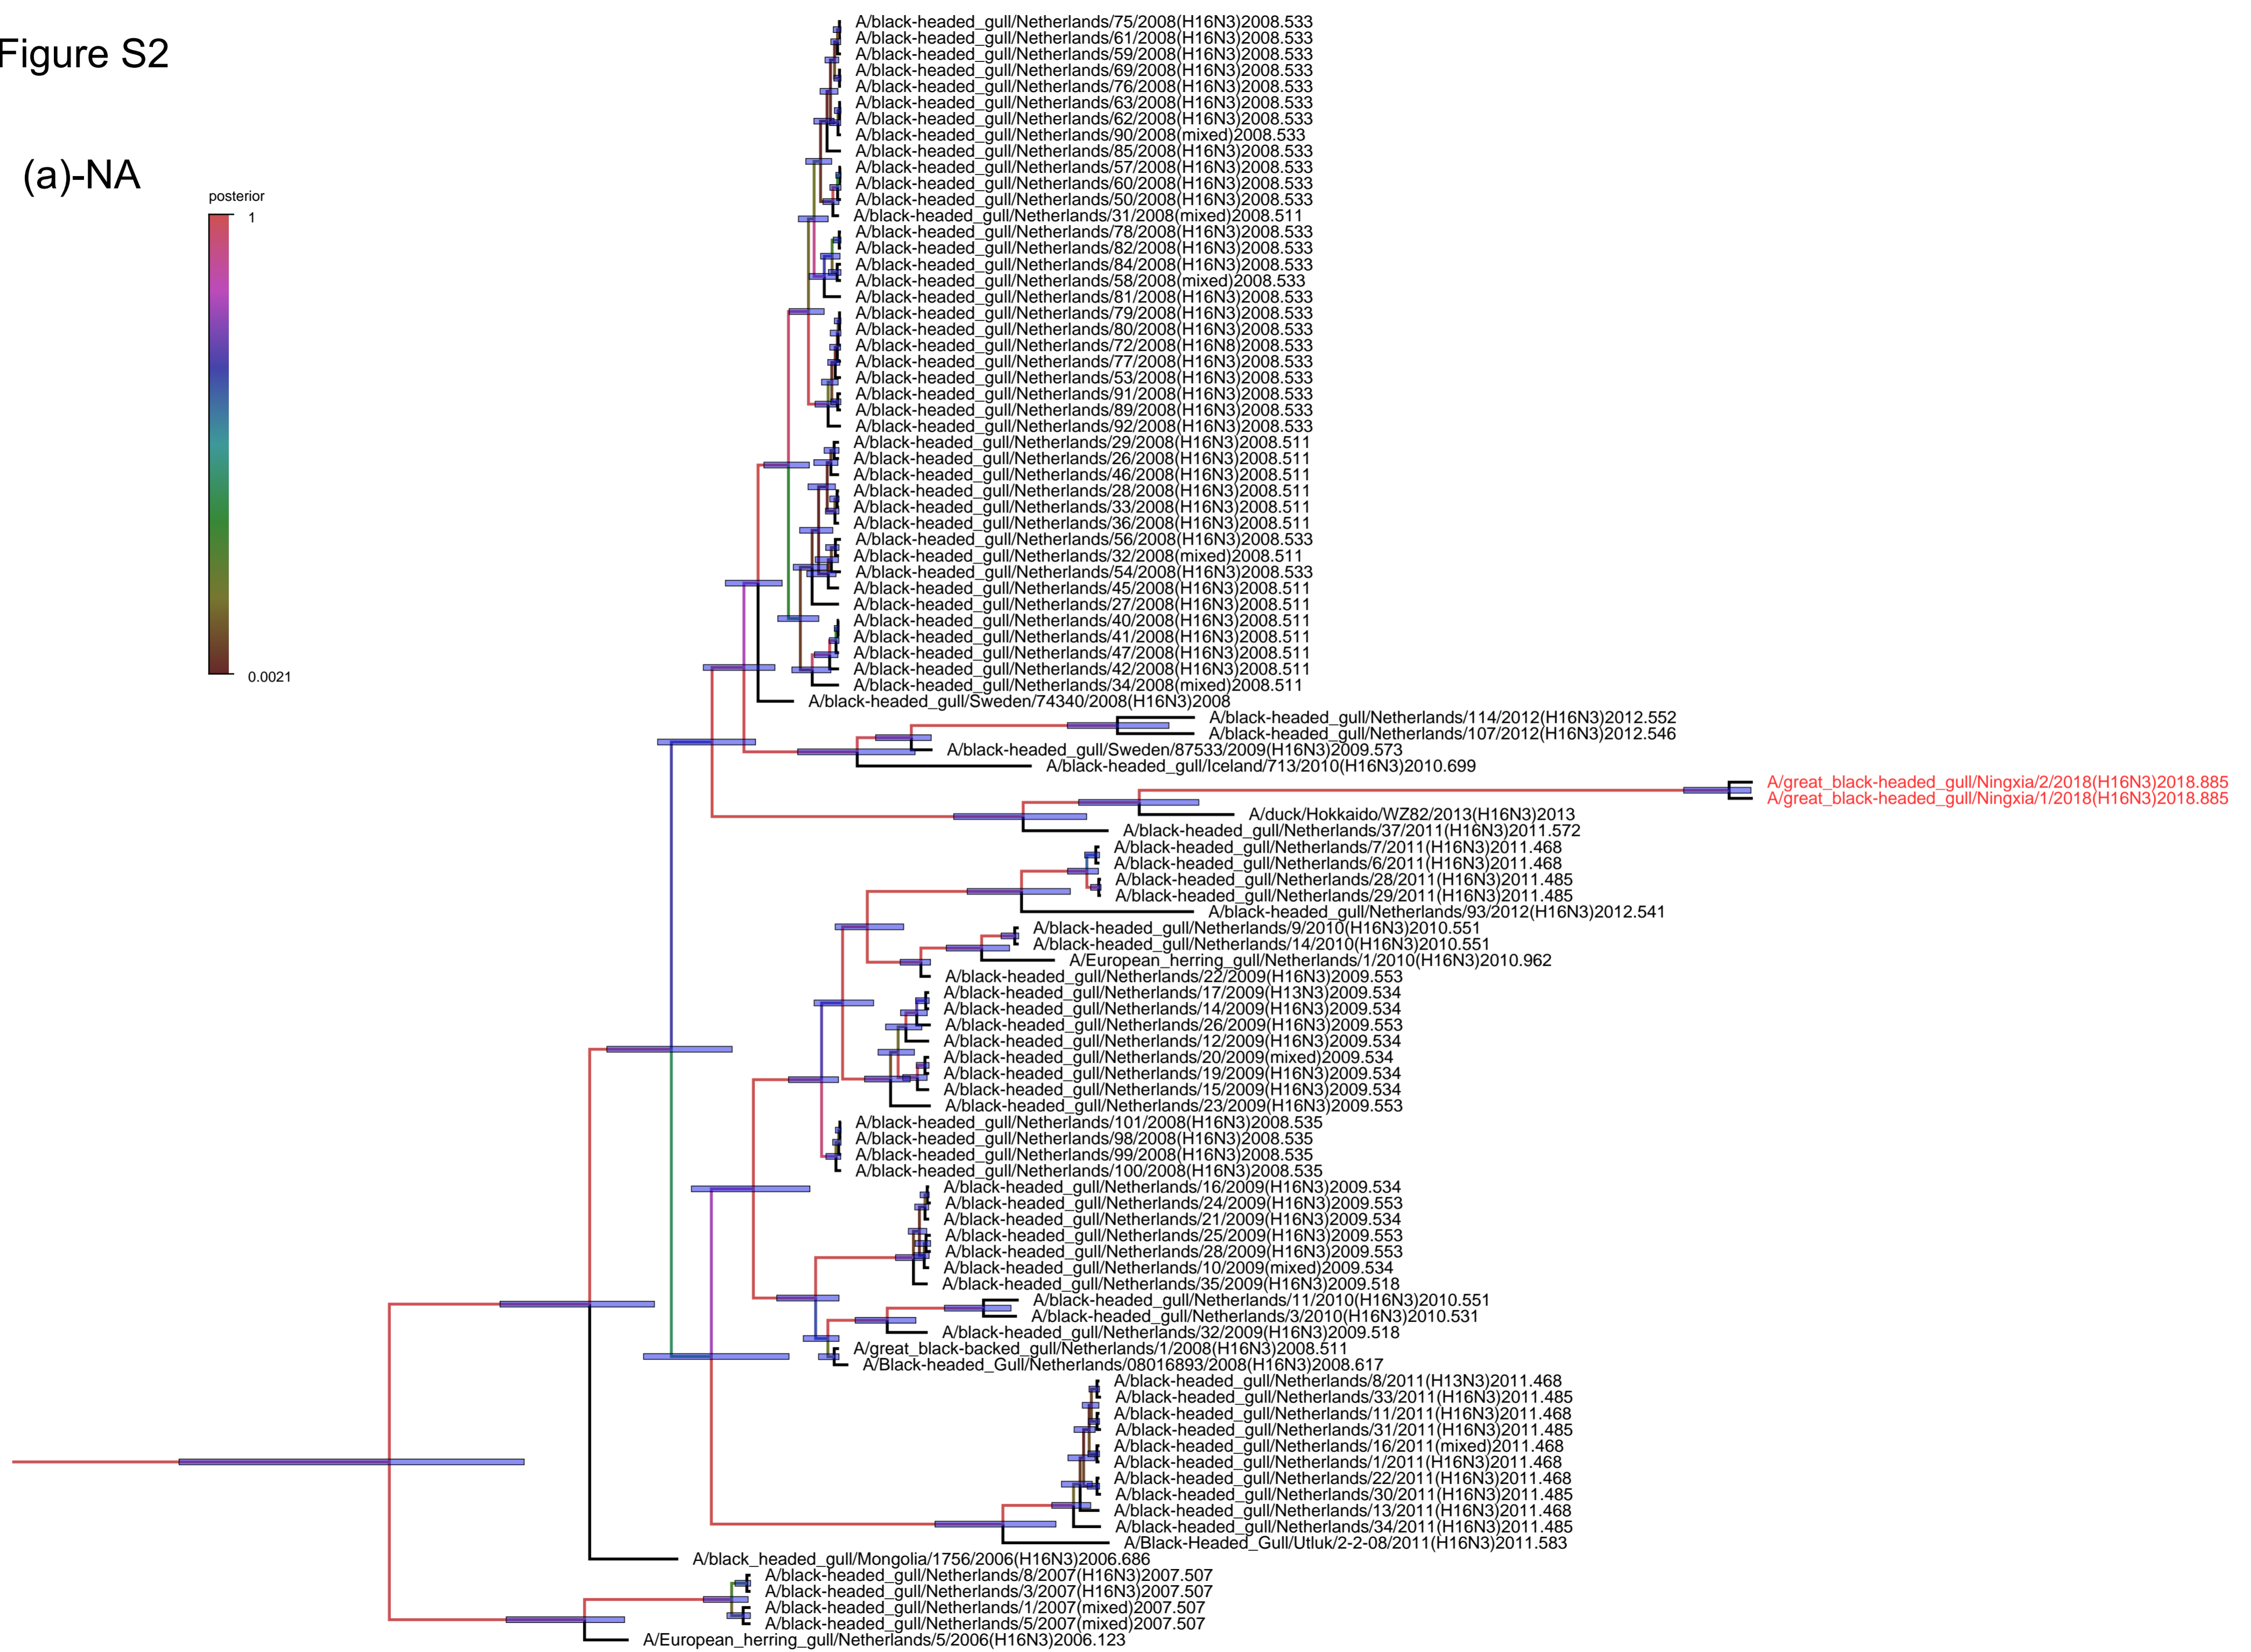

1998 2000 2002 2004 2006 2008 2010 2012 2014 2016 2018 2020

(b)-PB2

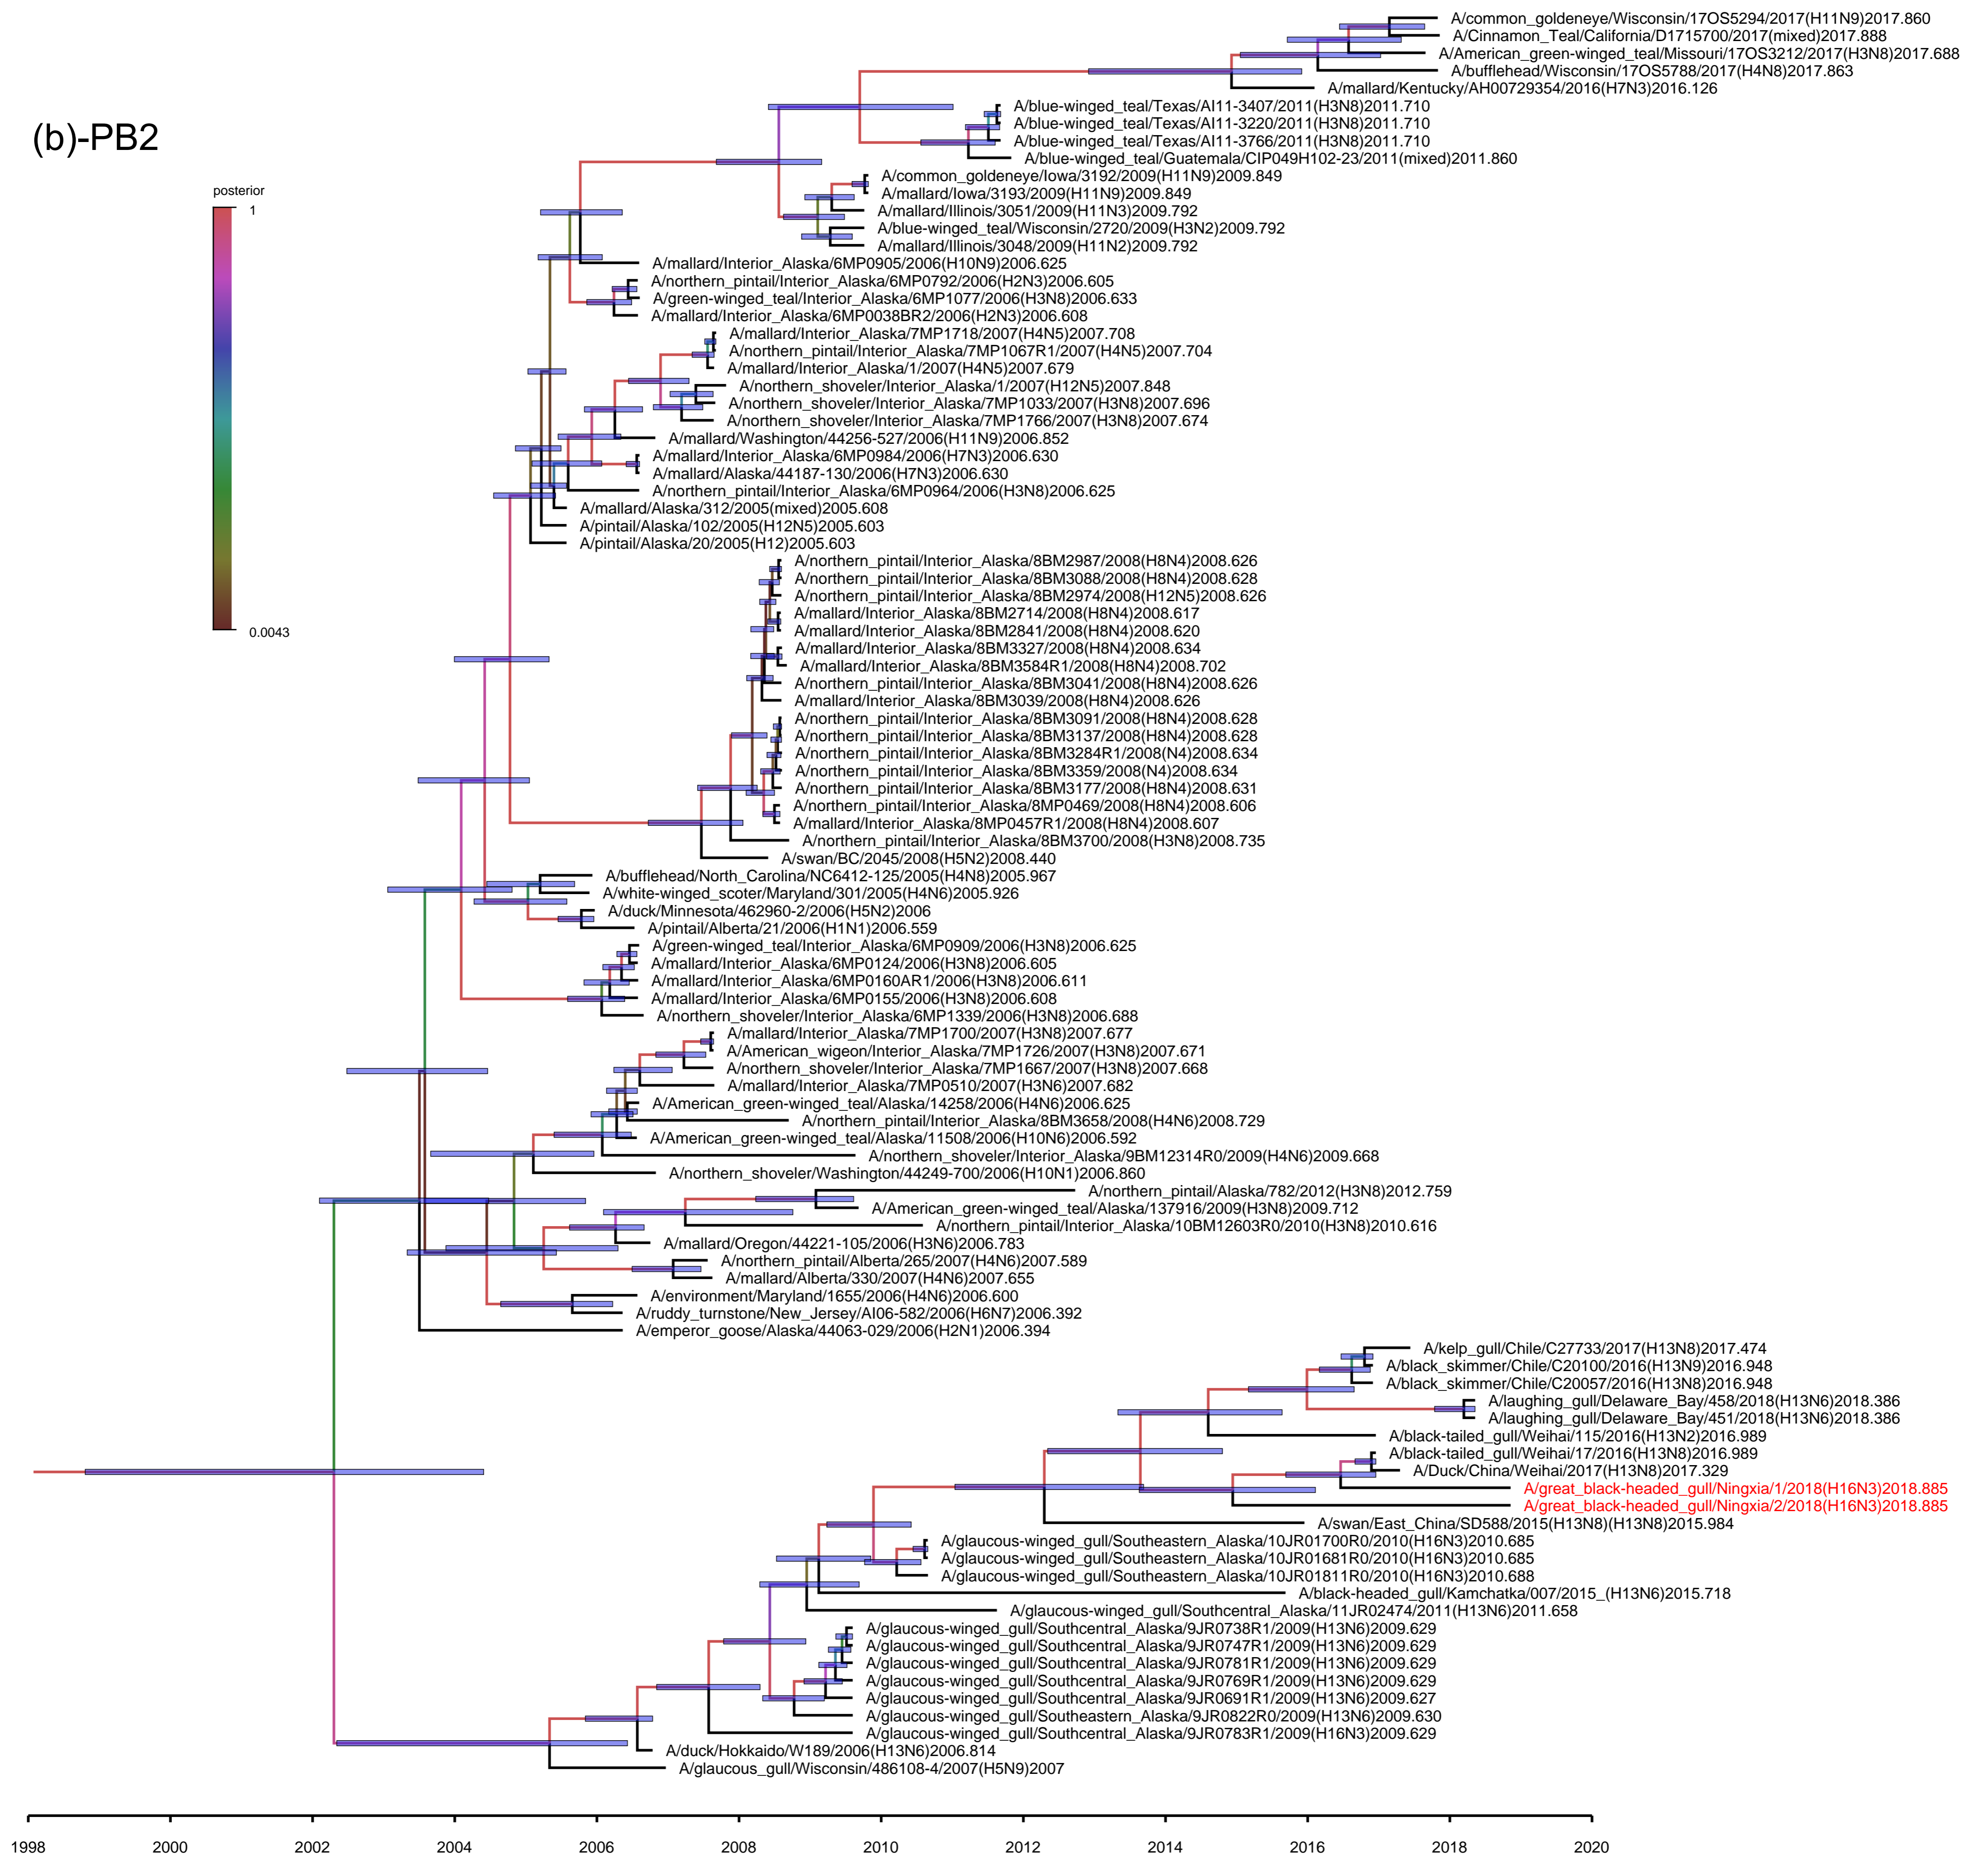

(c)-PA

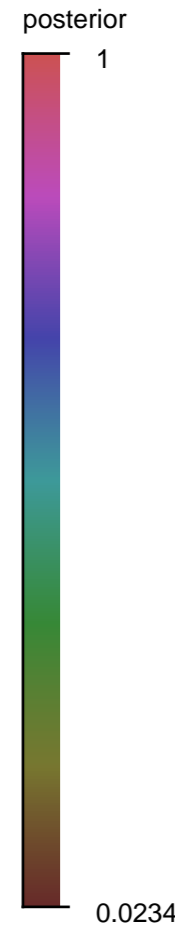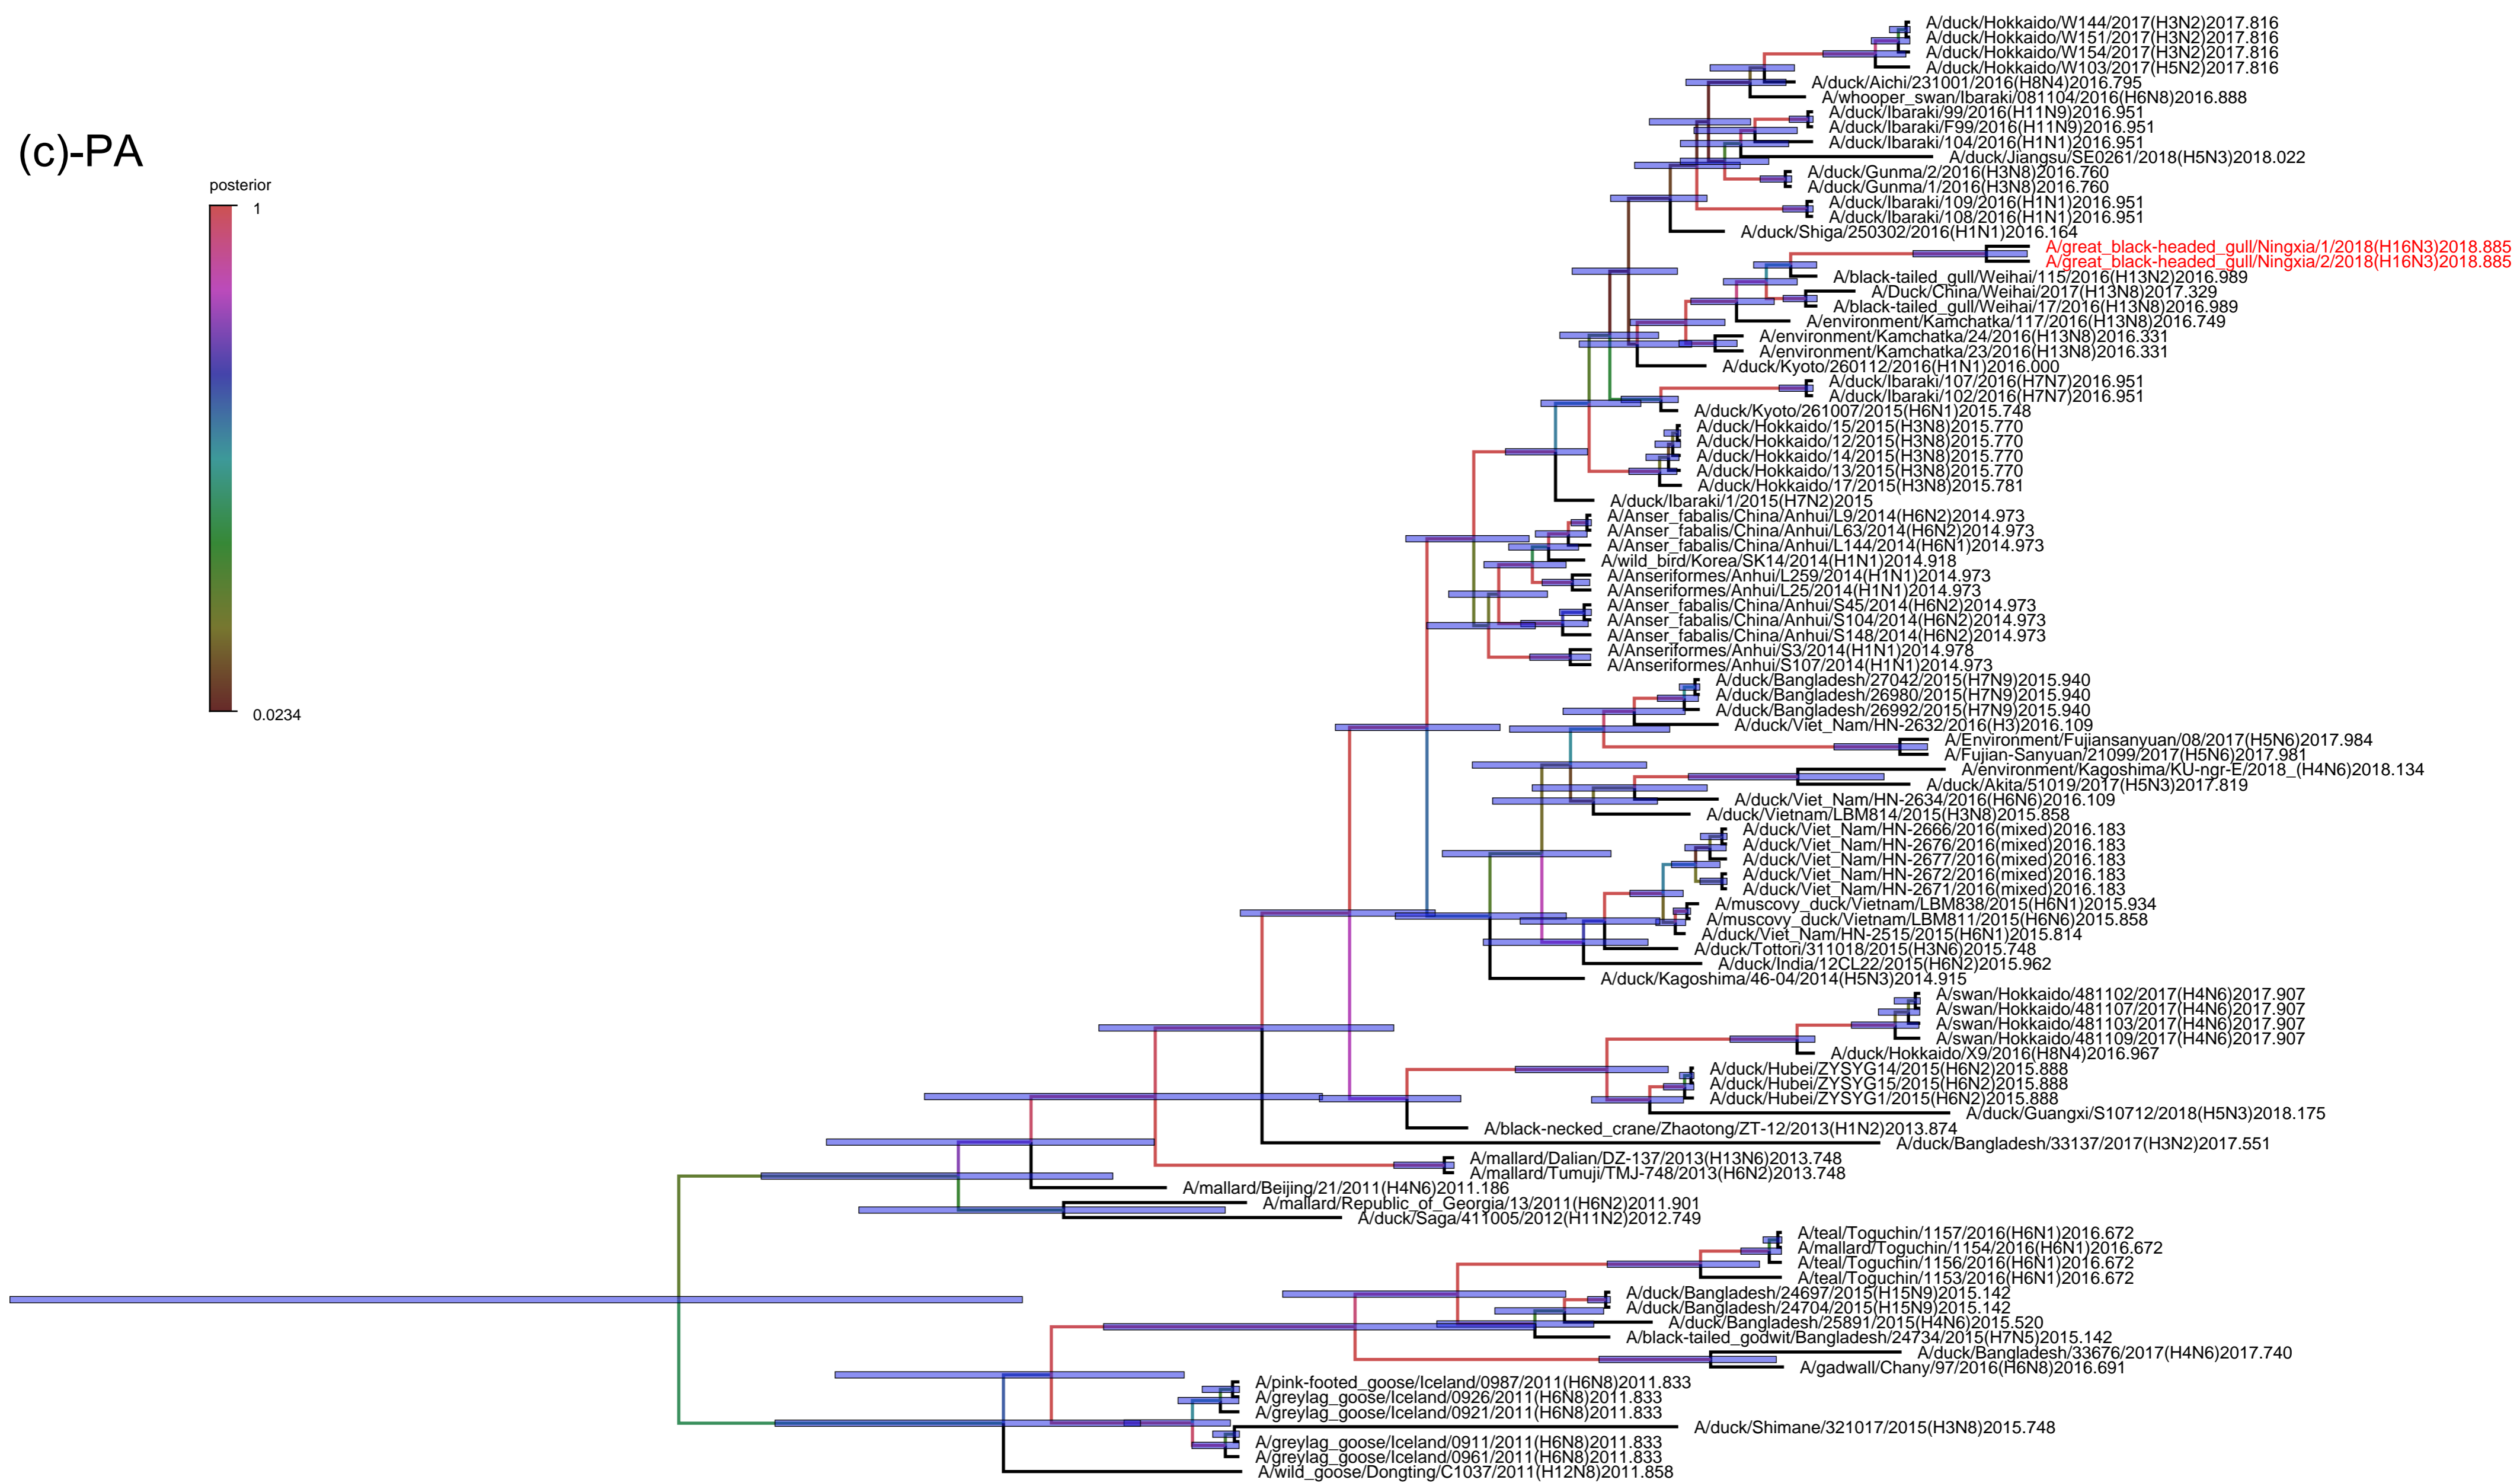

2000 2002 2004 2006 2008 2010 2012 2014 2016 2018 2020

(d)-NP

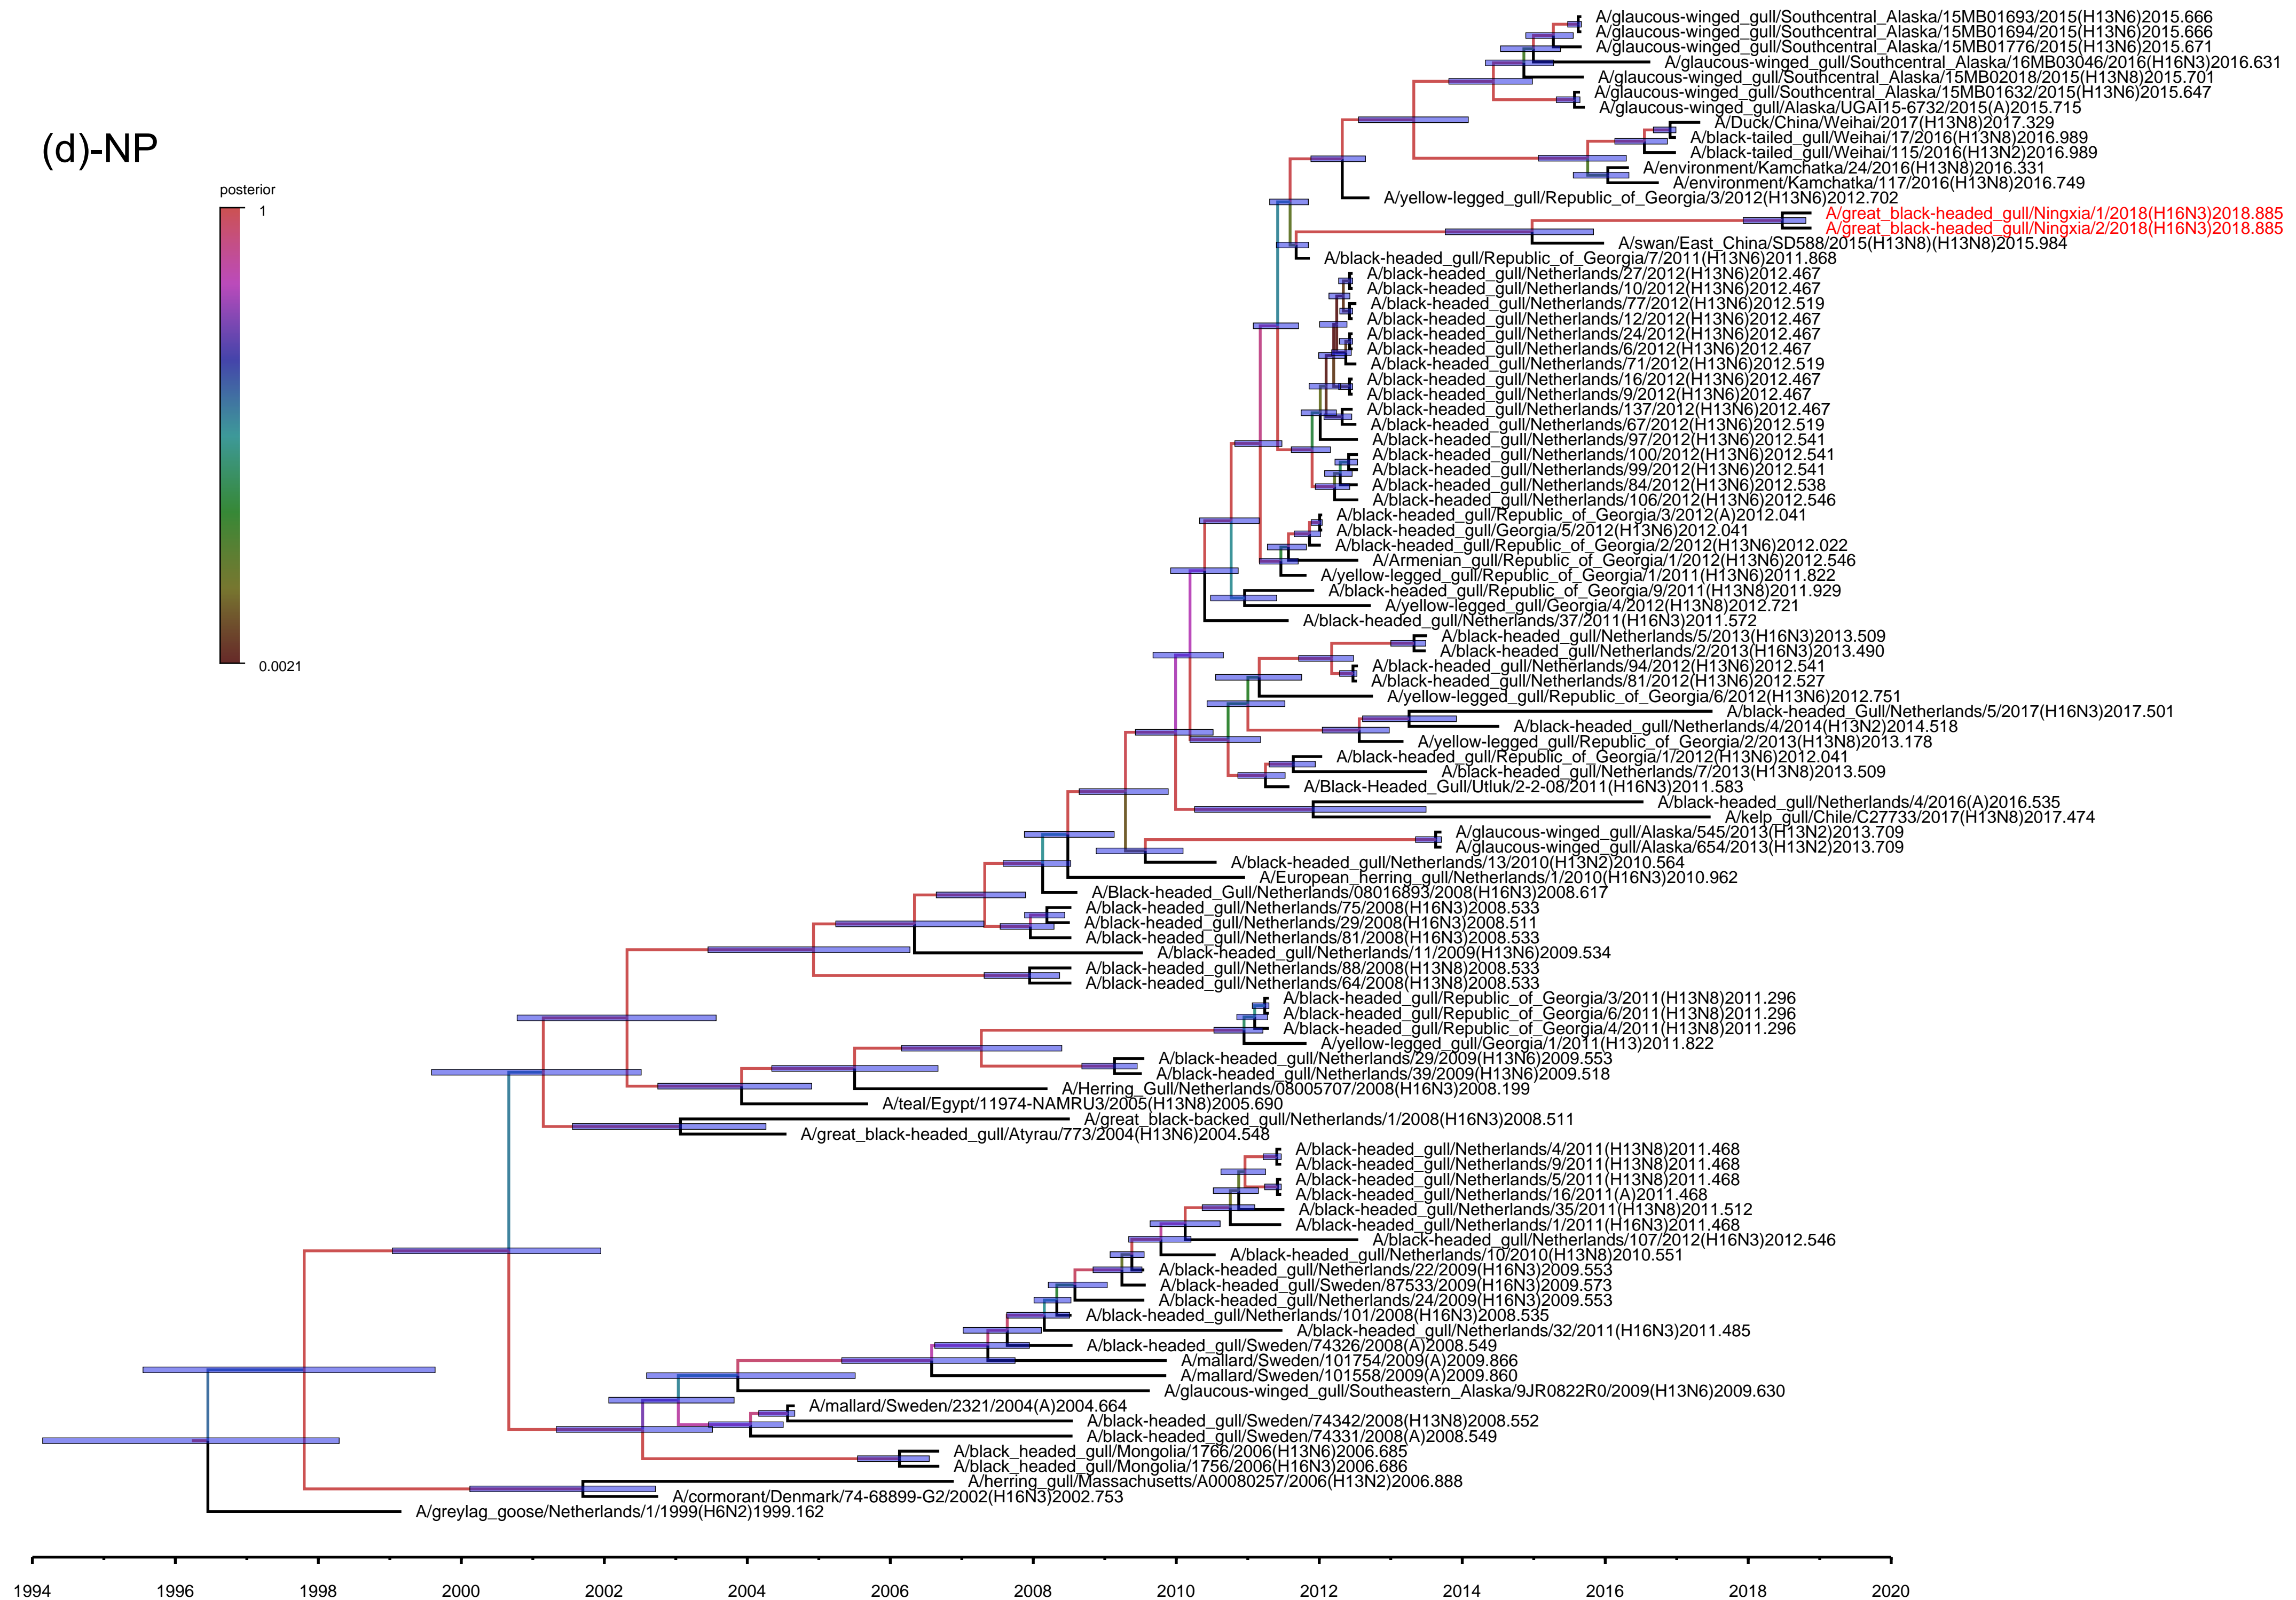

(e)-M

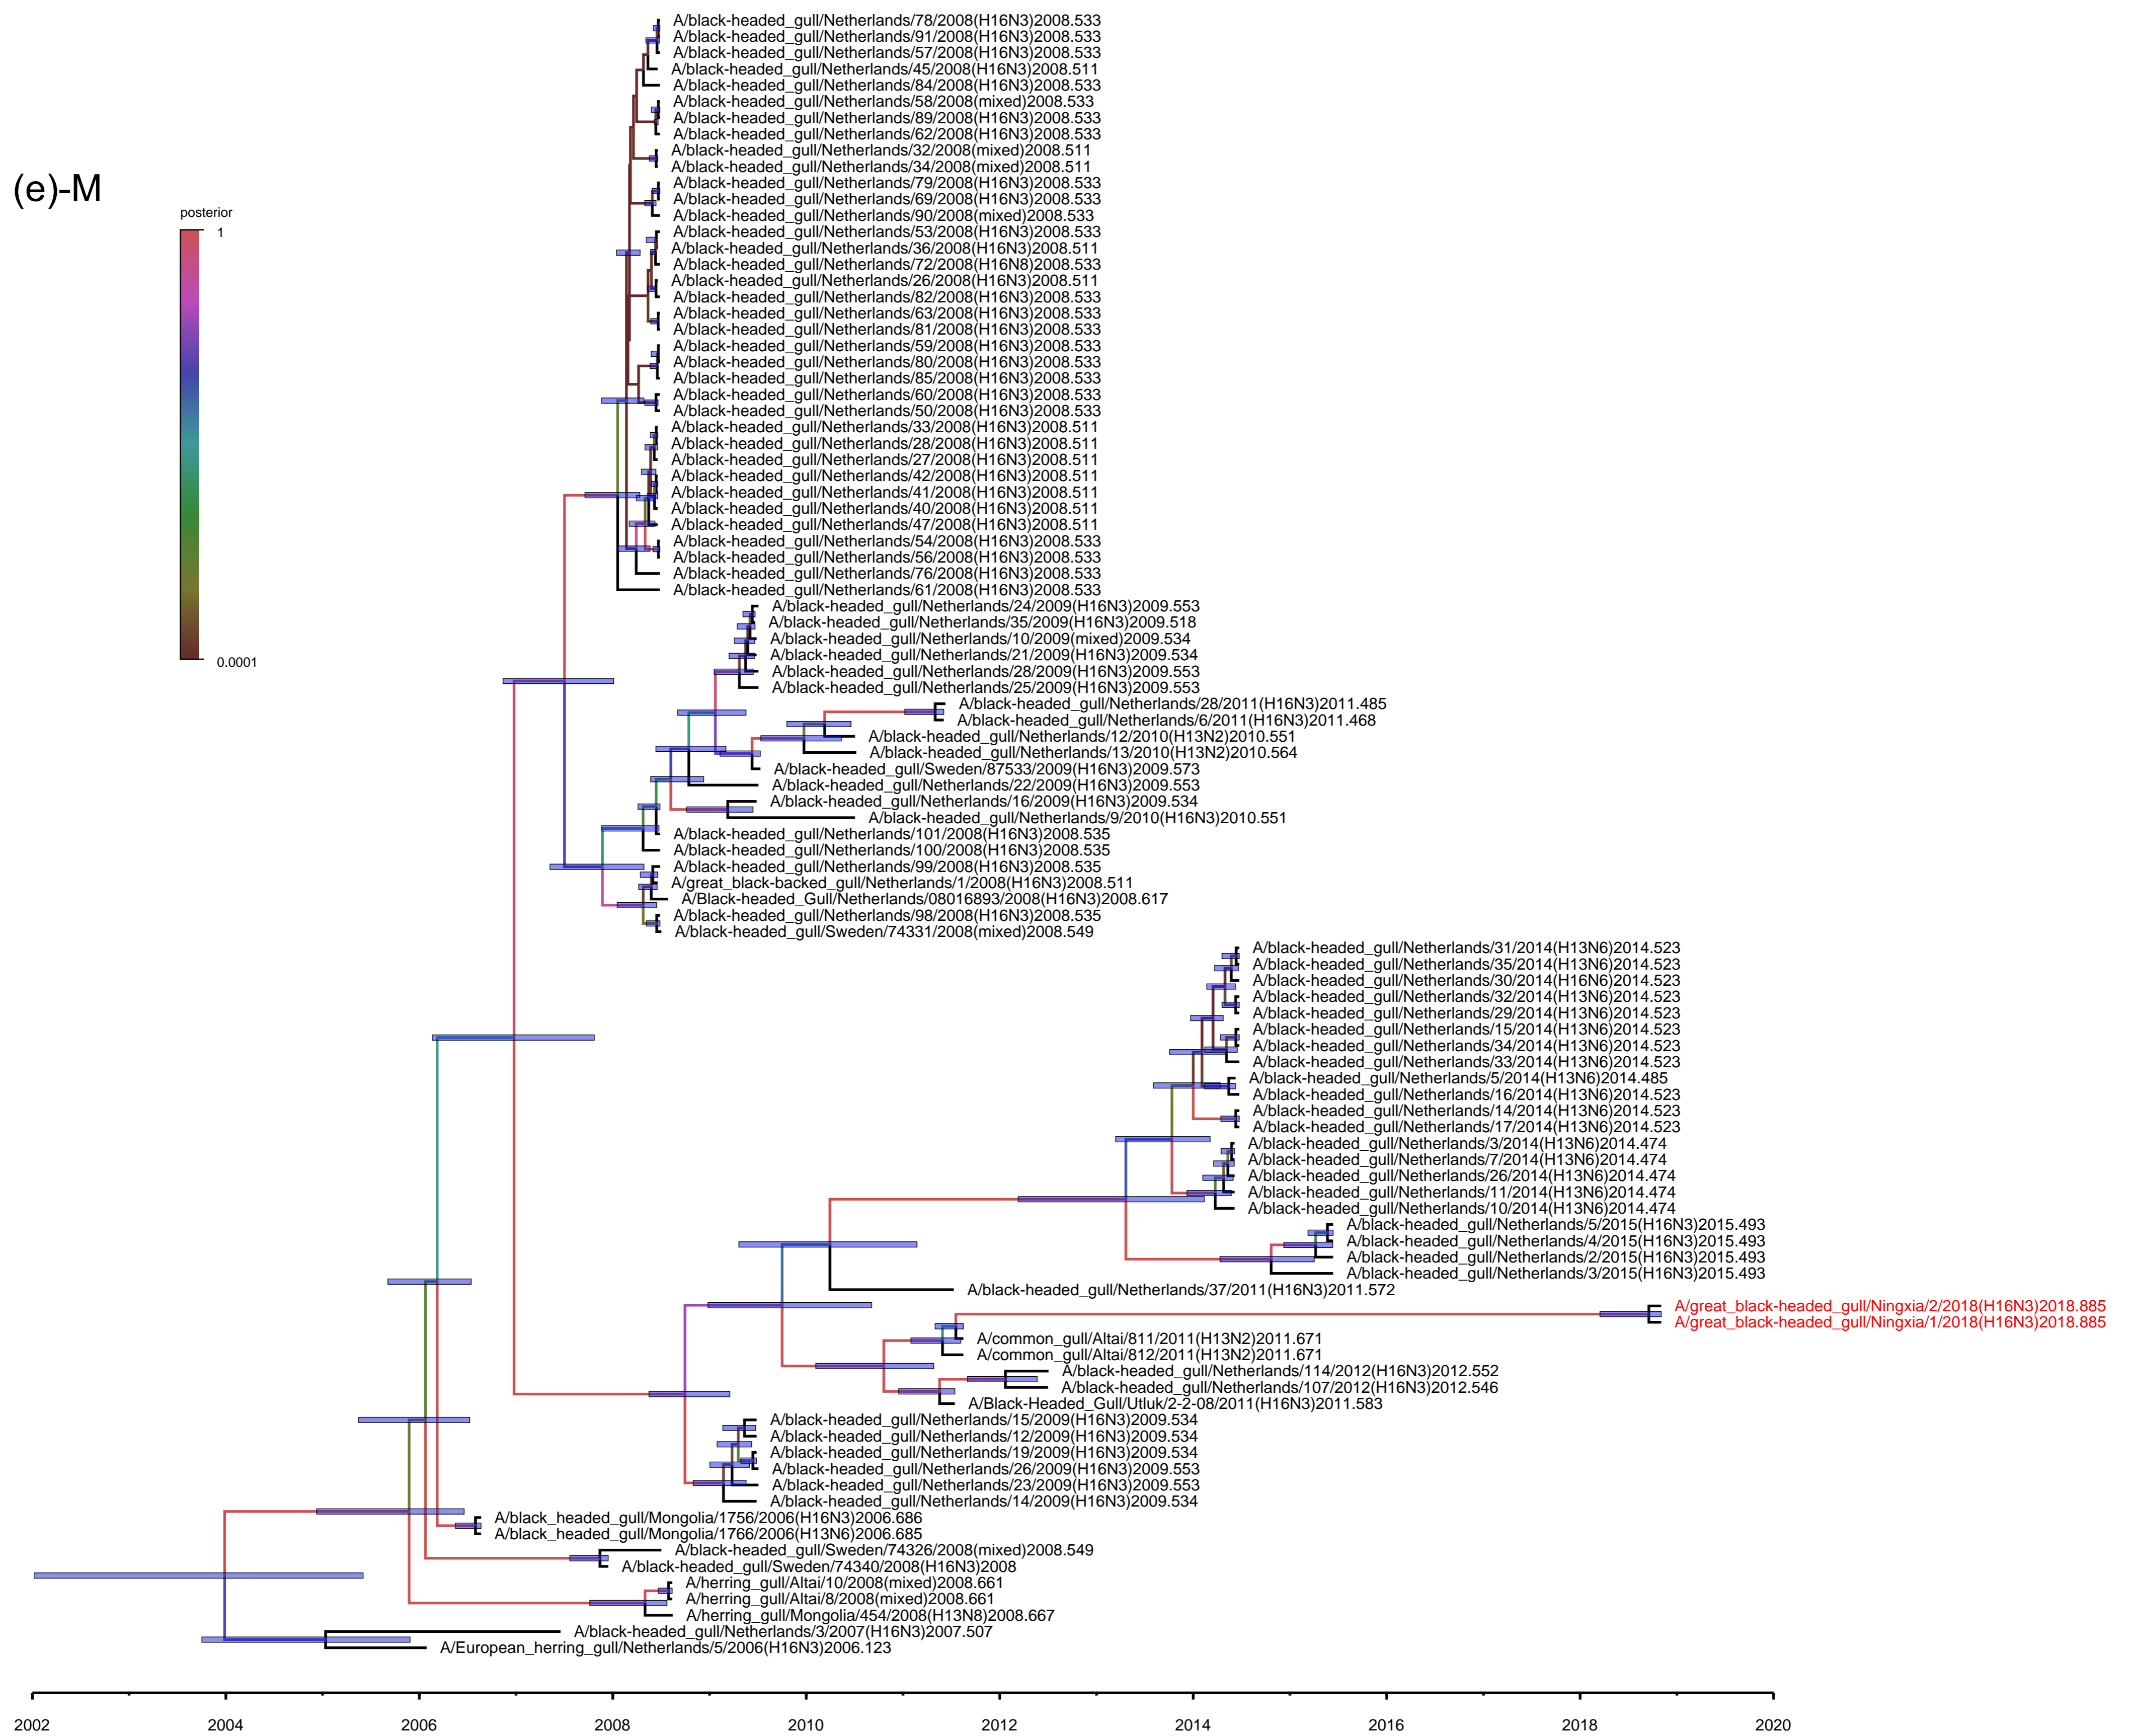

(f)-NS

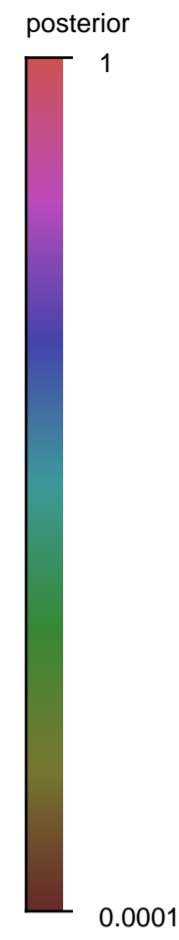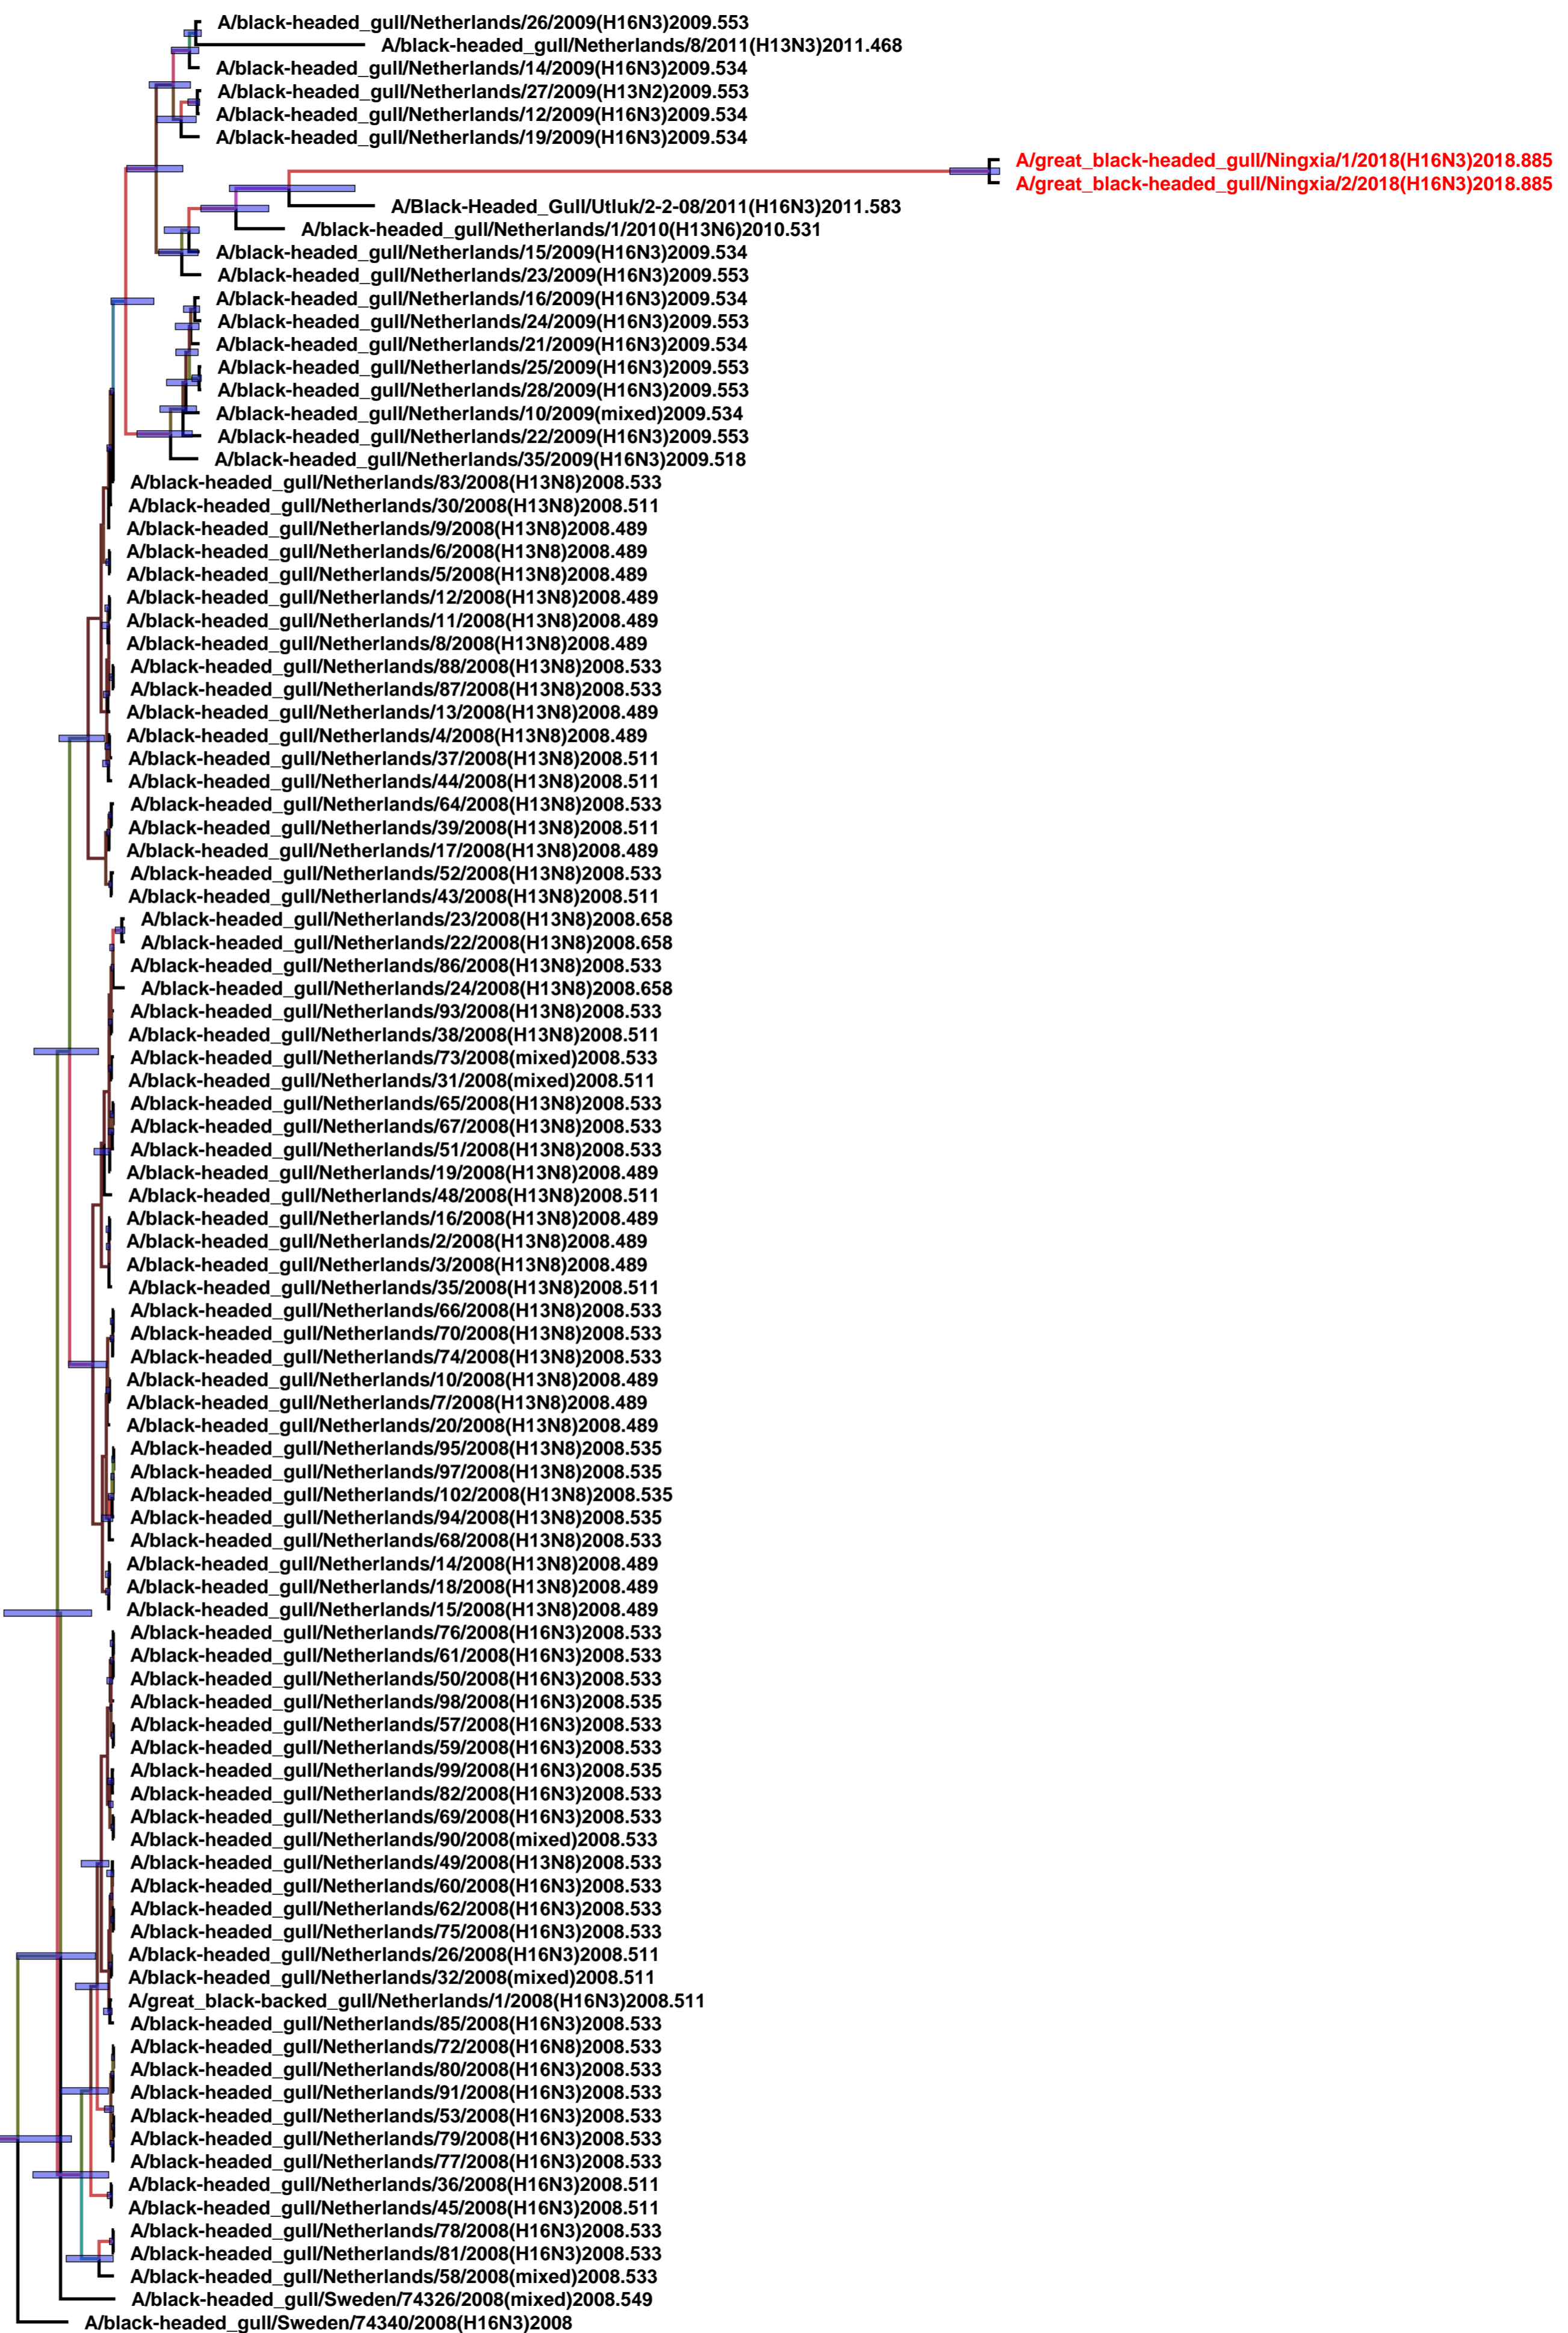

Supplement: TBED-67-1677-s002.pdf [file TBED-67-1677-s002.pdf]
